# Supplementary material for: Synthesis and characterization of Pd/NHCF complexes with fluorinated aryl groups
Source: Royal Society of Chemistry journal article supplement (doi:10.1039/d2dt00892k), 2022-01-01
Supplement: d2dt00892k1.pdf [file d2dt00892k1.pdf]

## Supporting Information

### Synthesis and characterization of Pd/NHC<sub>F</sub> complexes with fluorinated aryl groups

Darya O. Prima<sup>§</sup>, Roman O. Pankov<sup>§</sup>, Alexander Yu. Kostyukovich,<sup>§</sup> Mikhail E. Minyaev<sup>§</sup>, Julia V. Burykina<sup>§</sup>, Valentine P. Ananikov<sup>§\*</sup>

<sup>§</sup> *Zelinsky Institute of Organic Chemistry, Russian Academy of Sciences, Leninsky prospekt 47, Moscow, 119991, Russia;*

*\*e-mail: val@ioc.ac.ru; <http://AnanikovLab.ru>*

### Contents

|                                                                |    |
|----------------------------------------------------------------|----|
| NMR spectra of the obtained compounds .....                    | 2  |
| ESI-HRMS and ESI-UHRMS spectra of the obtained compounds. .... | 2  |
| X-ray crystallographic data and refinement details .....       | 20 |
| The structure of <b>3c</b> .....                               | 23 |
| The structure of <b>4a</b> .....                               | 25 |
| The structure of <b>4b</b> .....                               | 33 |
| The structure of <b>4c</b> .....                               | 37 |

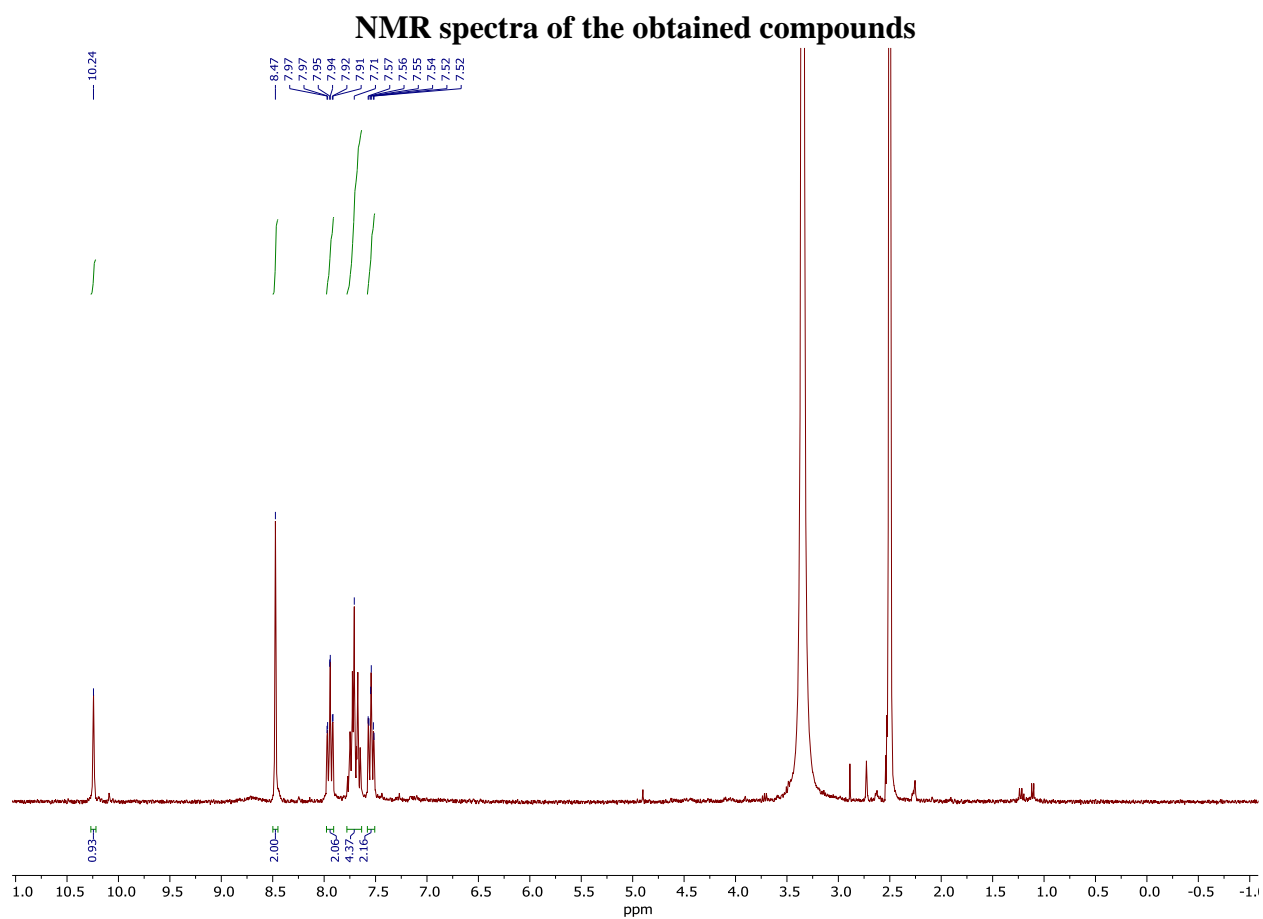

**Figure S1.**  $^1\text{H}$  NMR spectrum of **3a**. Solvent:  $\text{DMSO-}d_6$ , 300 MHz.

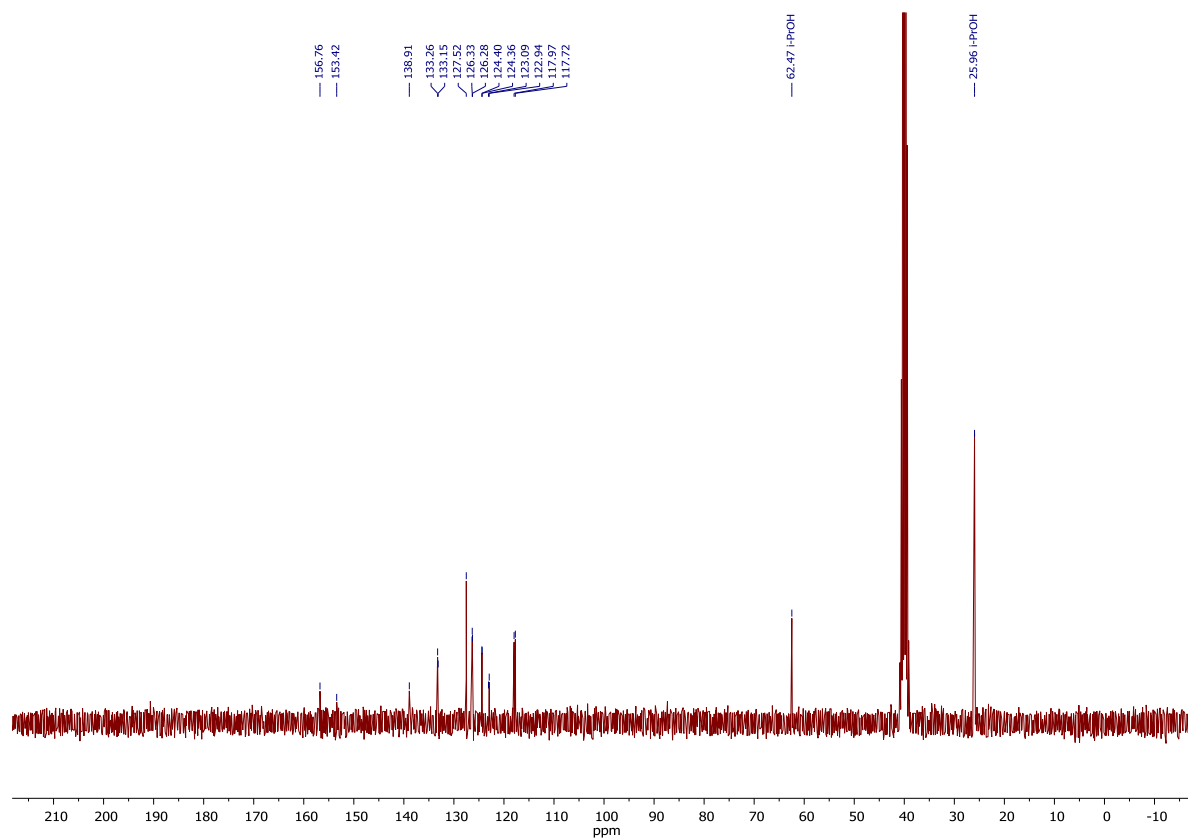

**Figure S2.**  $^{13}\text{C}\{^1\text{H}\}$  NMR spectrum of **3a**. Solvent:  $\text{DMSO-}d_6$ , 75 MHz.

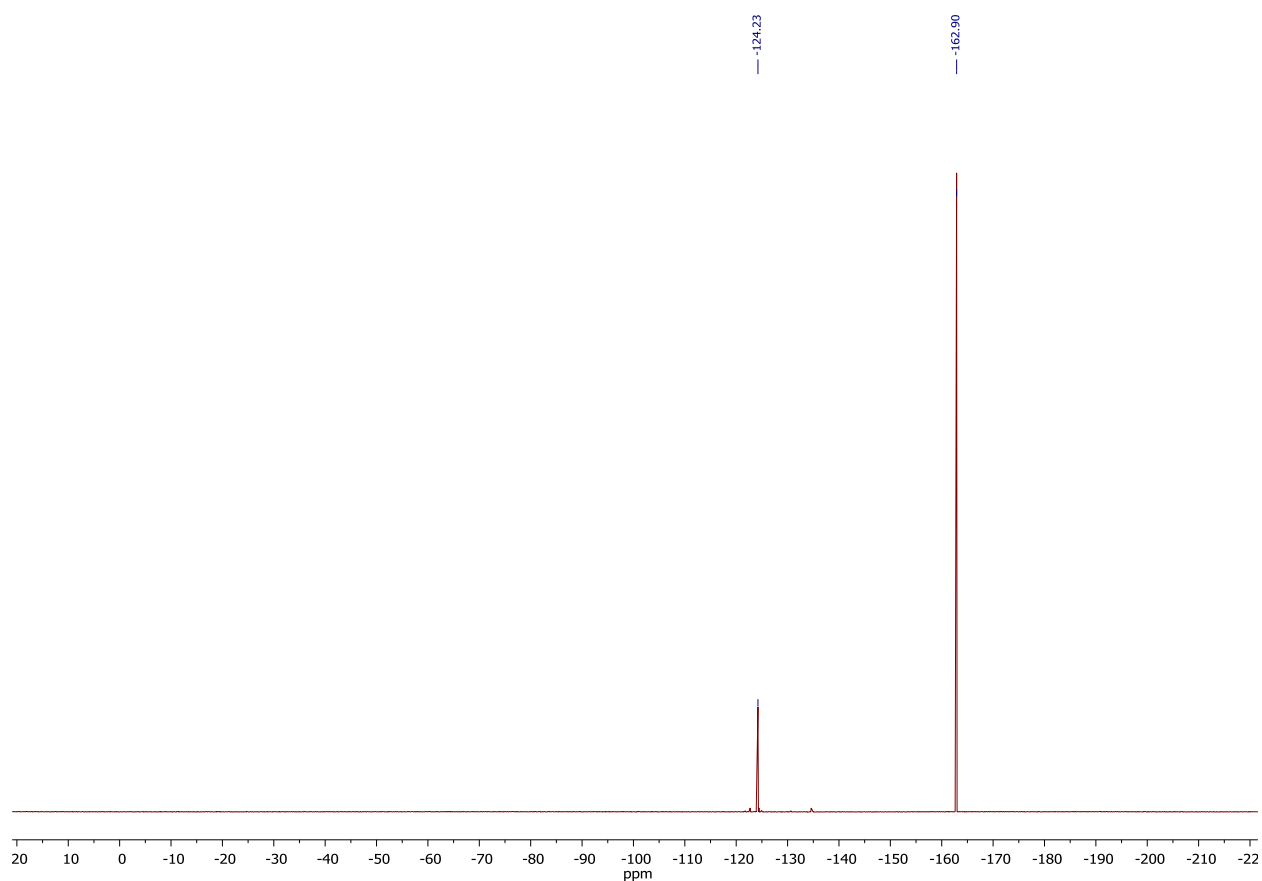

**Figure S3.**  $^{19}\text{F}\{^1\text{H}\}$  NMR spectrum of **3a**. Solvent:  $\text{DMSO-}d_6$ , 282.4 MHz. Standard:  $\text{C}_6\text{F}_6$  with respect to  $\text{CFCl}_3$ .

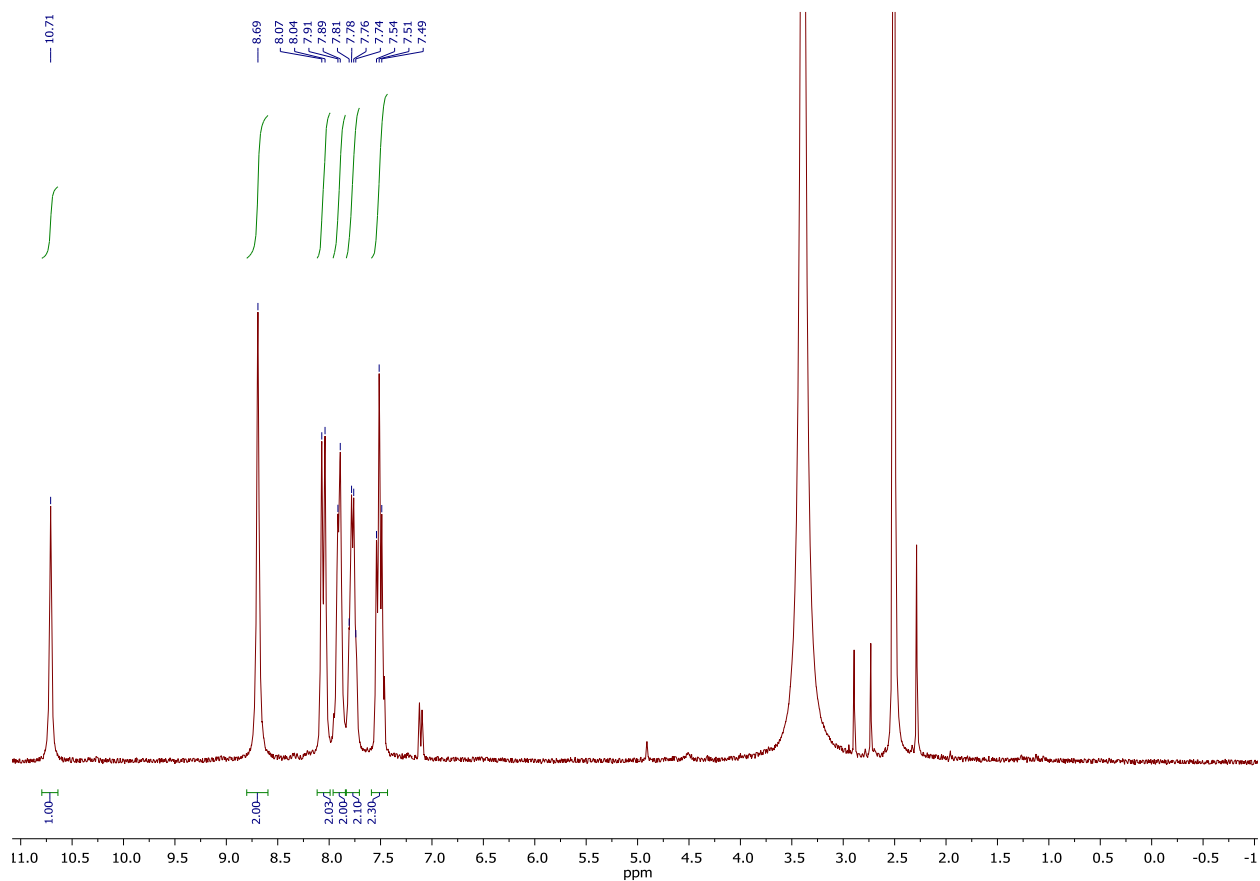

**Figure S4.**  $^1\text{H}$  NMR spectrum of **3b**. Solvent:  $\text{DMSO-}d_6$ , 300 MHz.

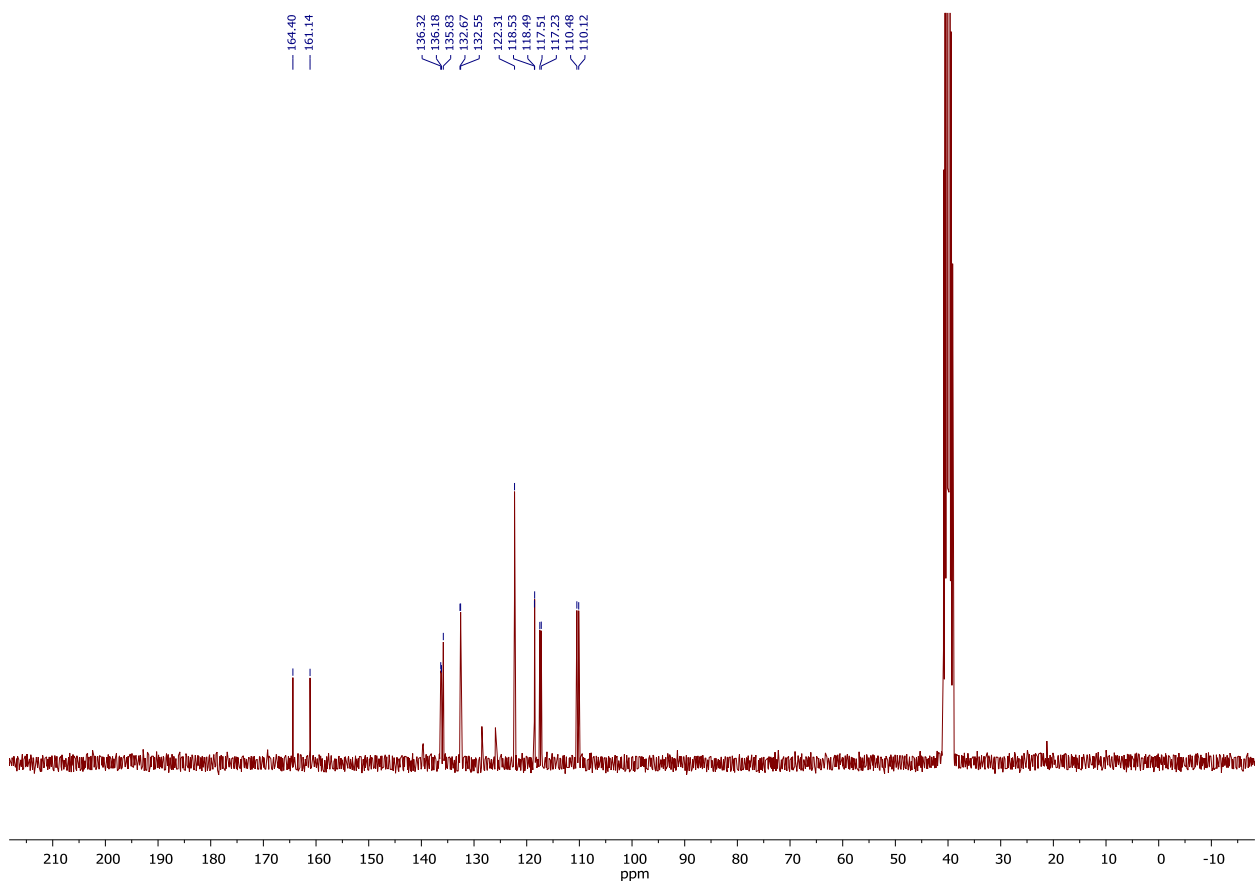

**Figure S5.**  $^{13}\text{C}\{^1\text{H}\}$  NMR spectrum of **3b**. Solvent:  $\text{DMSO-}d_6$ , 75 MHz.

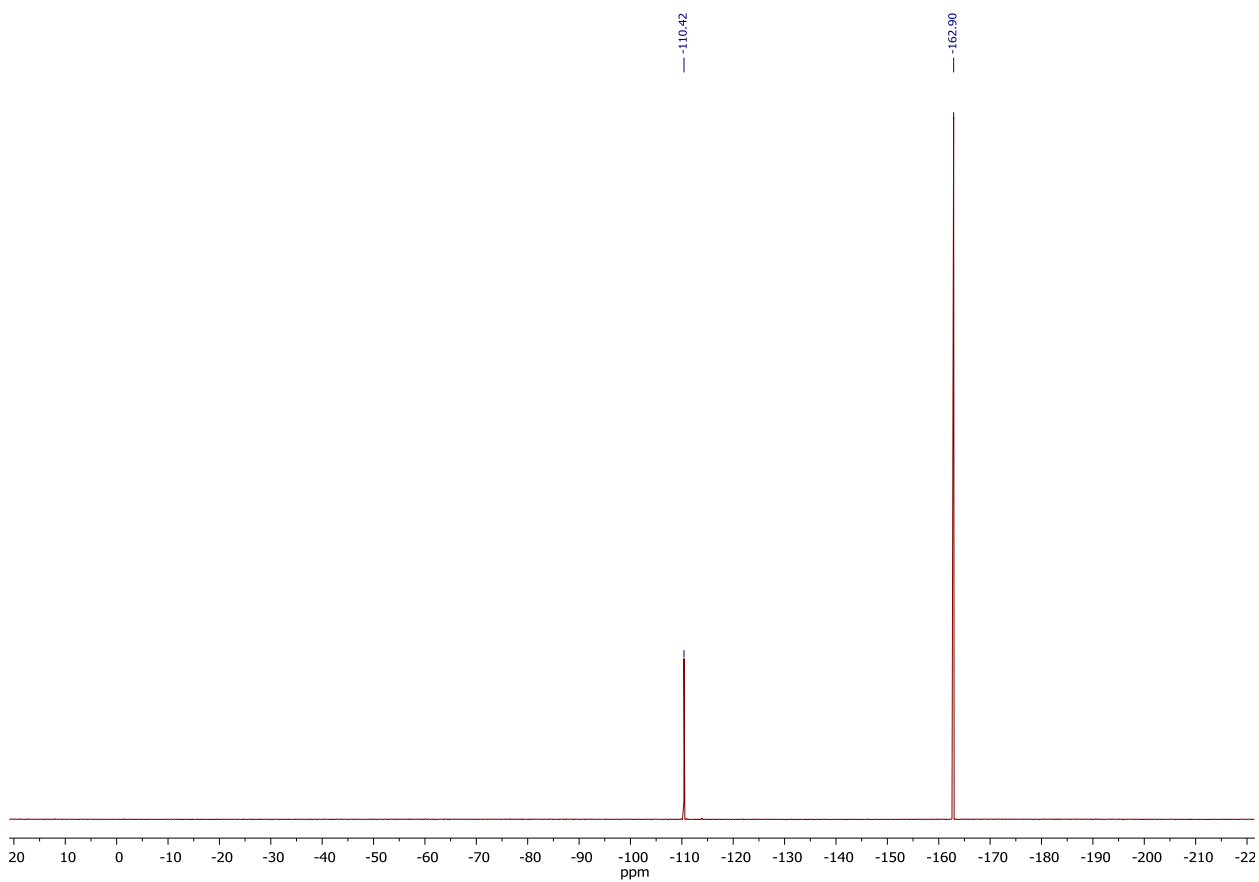

**Figure S6.**  $^{19}\text{F}\{^1\text{H}\}$  NMR spectrum of **3b**. Solvent:  $\text{DMSO-}d_6$ , 282.4 MHz. Standard:  $\text{C}_6\text{F}_6$  with respect to  $\text{CFCl}_3$ .

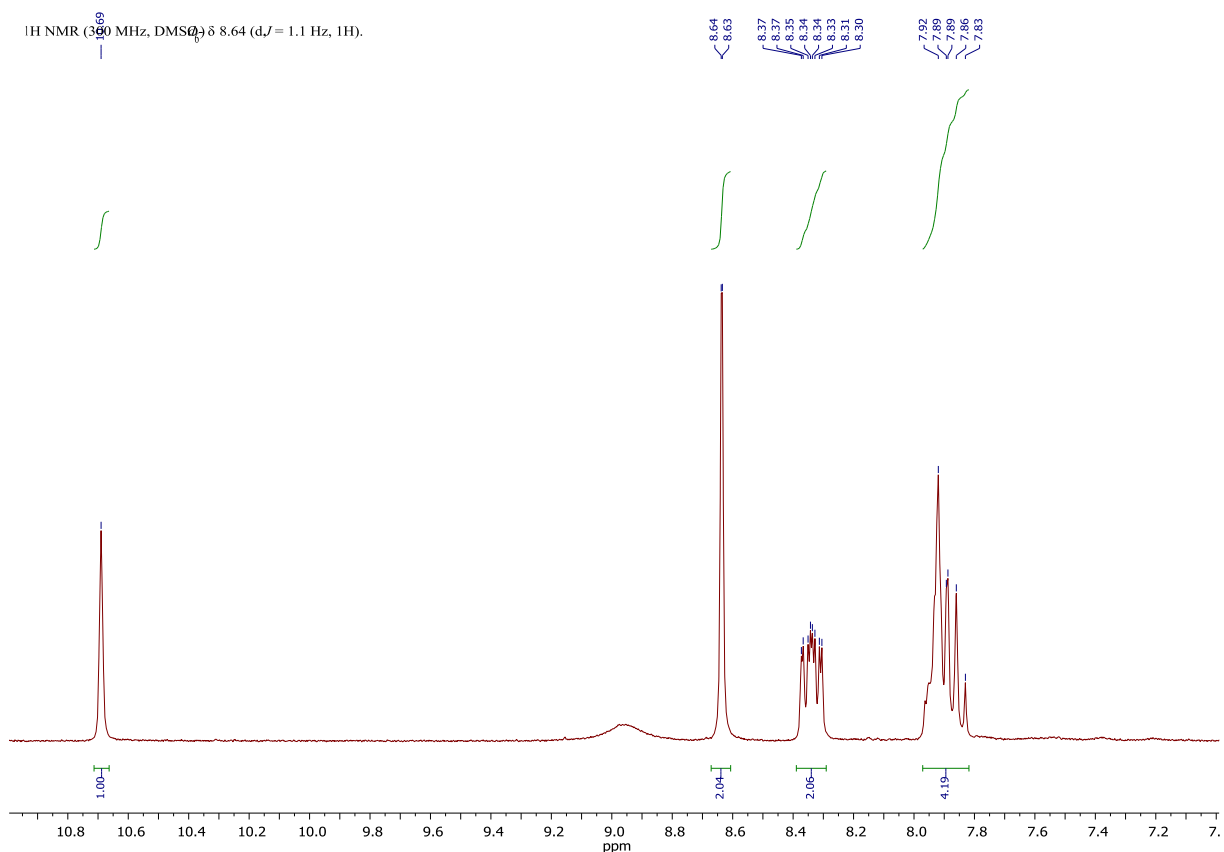

**Figure S7.**  $^1\text{H NMR}$  spectrum of **3c**. Solvent:  $\text{DMSO-}d_6$ , 300 MHz.

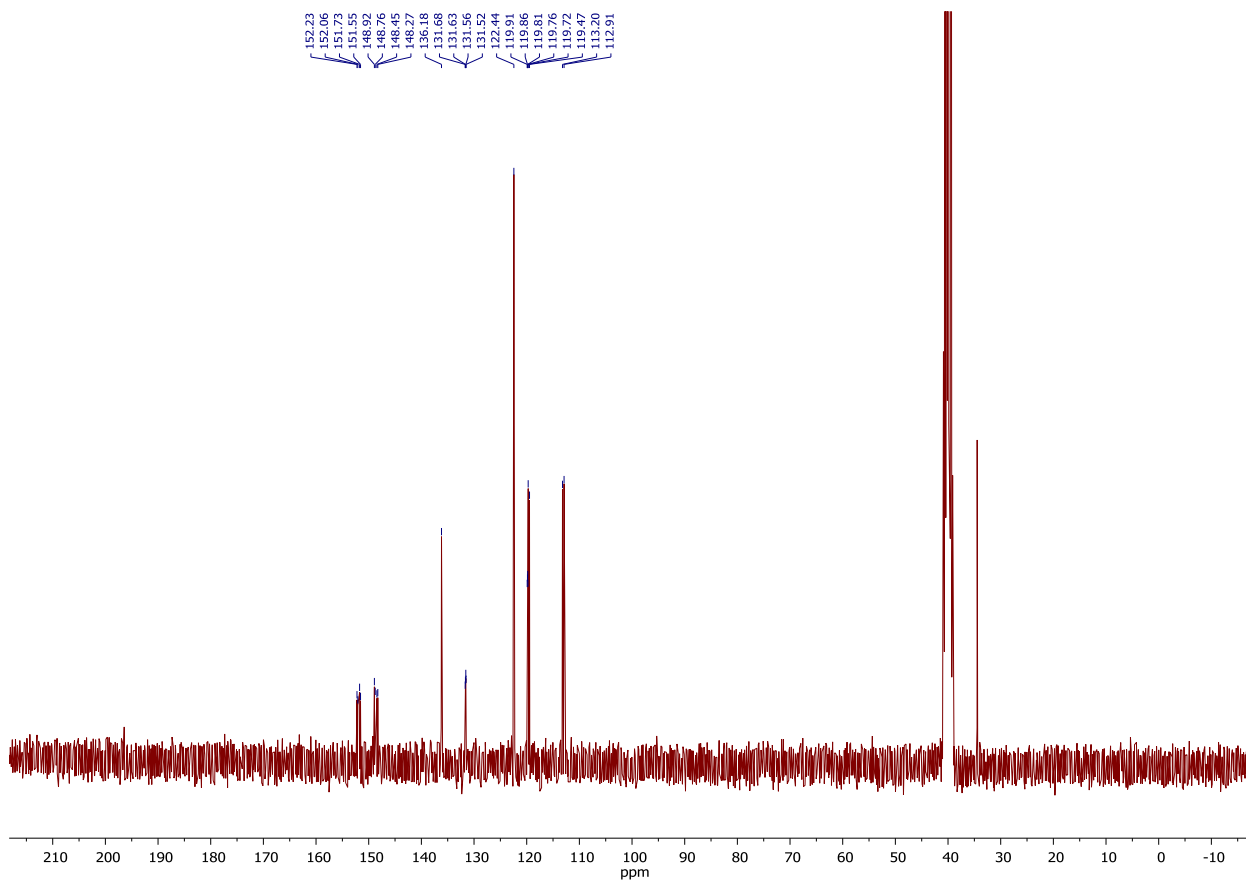

**Figure S8.**  $^{13}\text{C}\{^1\text{H}\}$  NMR spectrum of **3c**. Solvent:  $\text{DMSO-}d_6$ , 75 MHz.

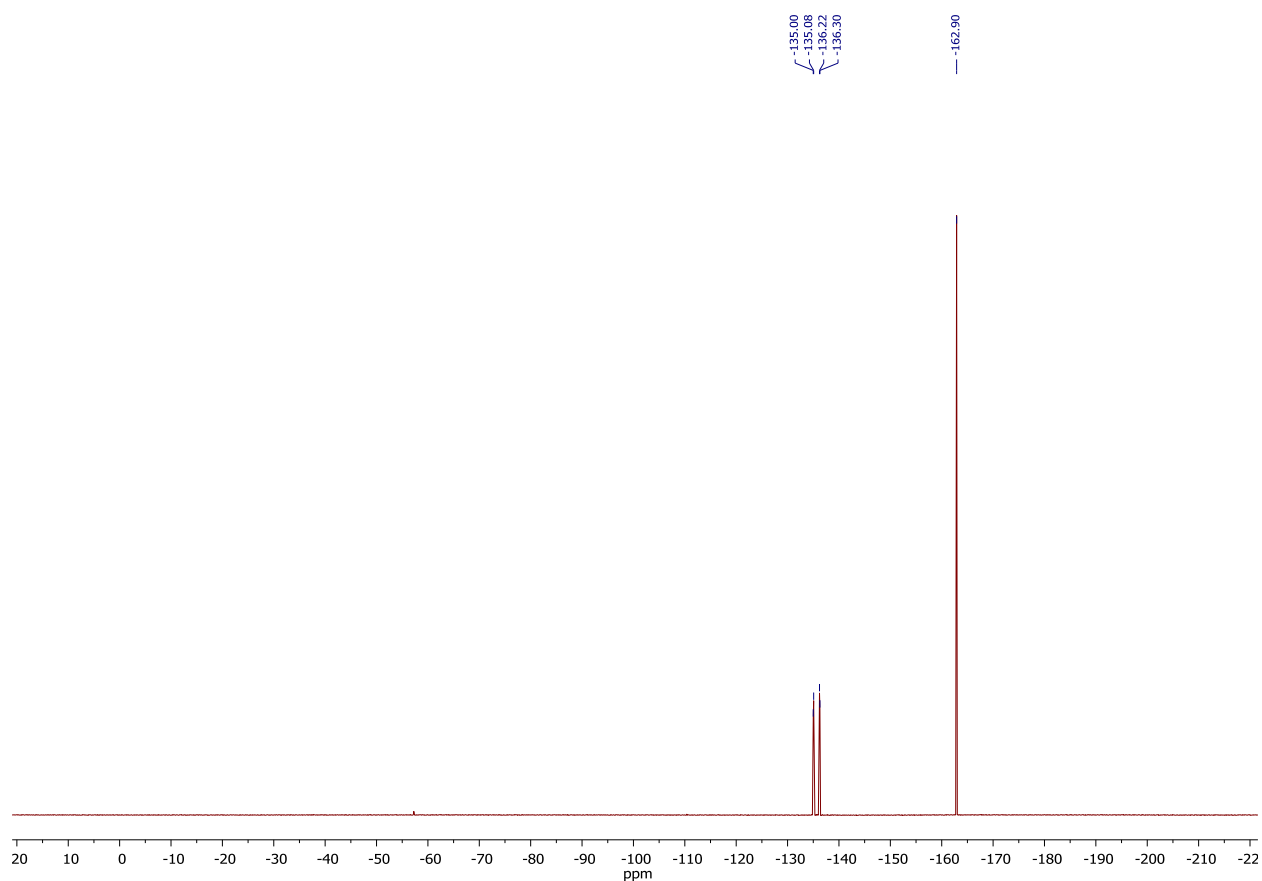

**Figure S9.**  $^{19}\text{F}\{^1\text{H}\}$  NMR spectrum of **3c**. Solvent:  $\text{DMSO-}d_6$ , 282.4 MHz. Standard:  $\text{C}_6\text{F}_6$  with respect to  $\text{CFCl}_3$ .

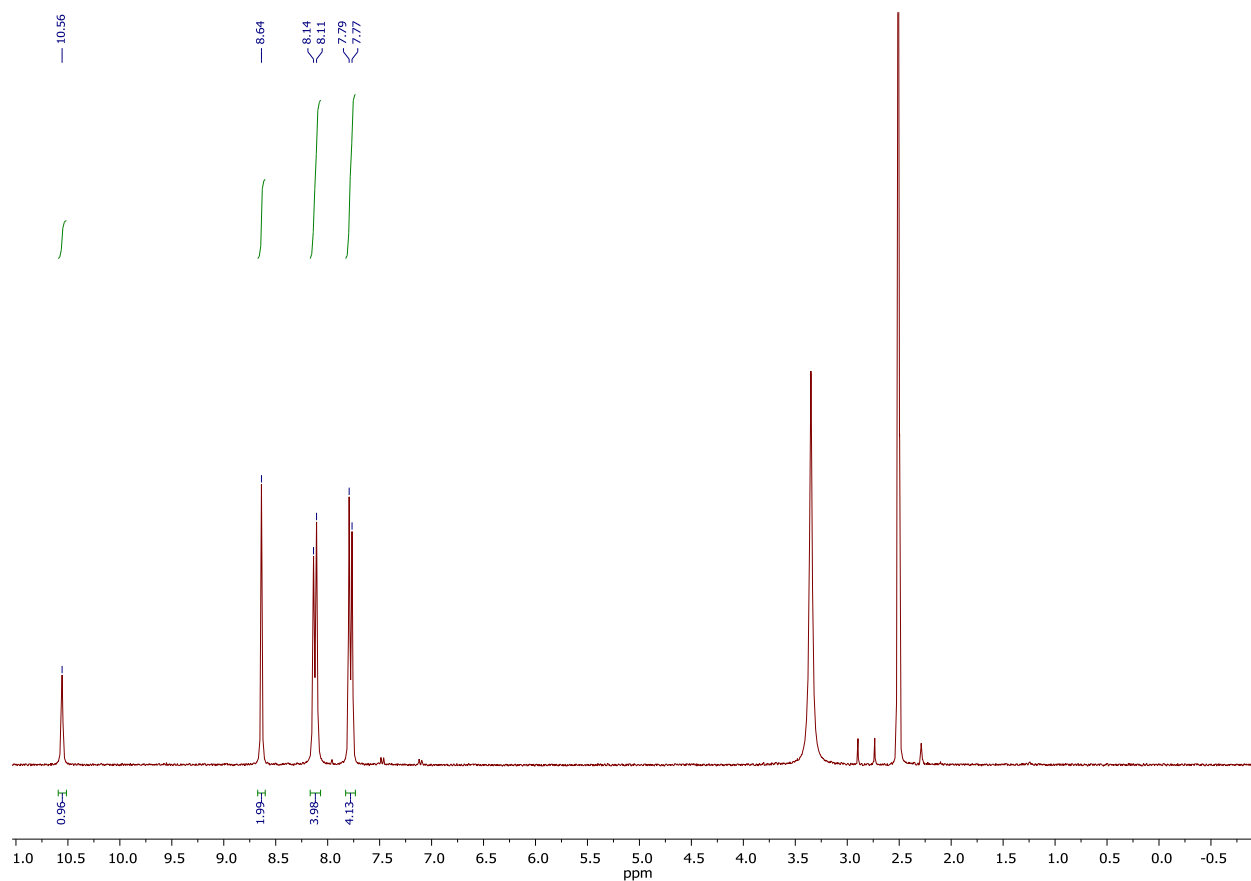

**Figure S10.**  $^1\text{H}$  NMR spectrum of **3d**. Solvent:  $\text{DMSO-}d_6$ , 300 MHz.

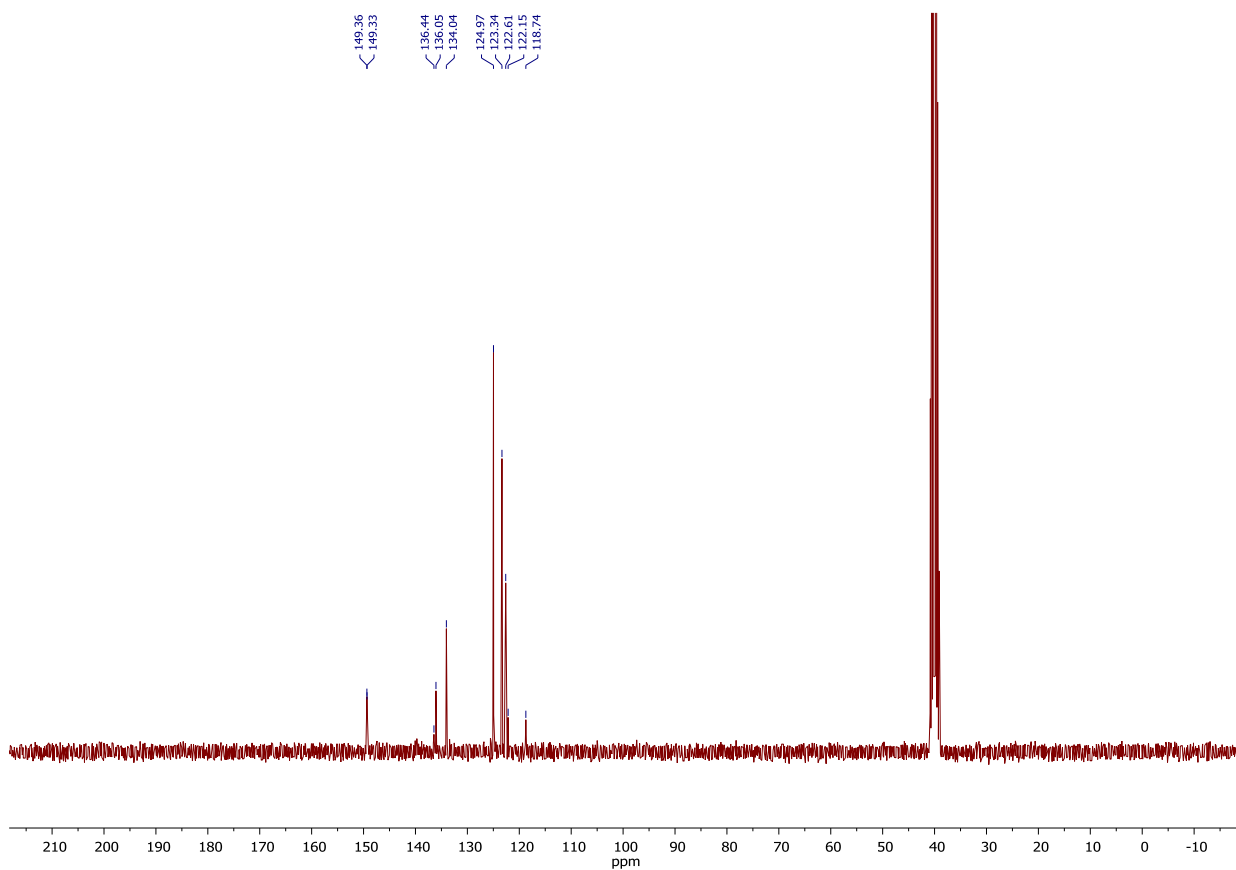

**Figure S11.**  $^{13}\text{C}\{^1\text{H}\}$  NMR spectrum of **3d**. Solvent:  $\text{DMSO-}d_6$ , 75 MHz.

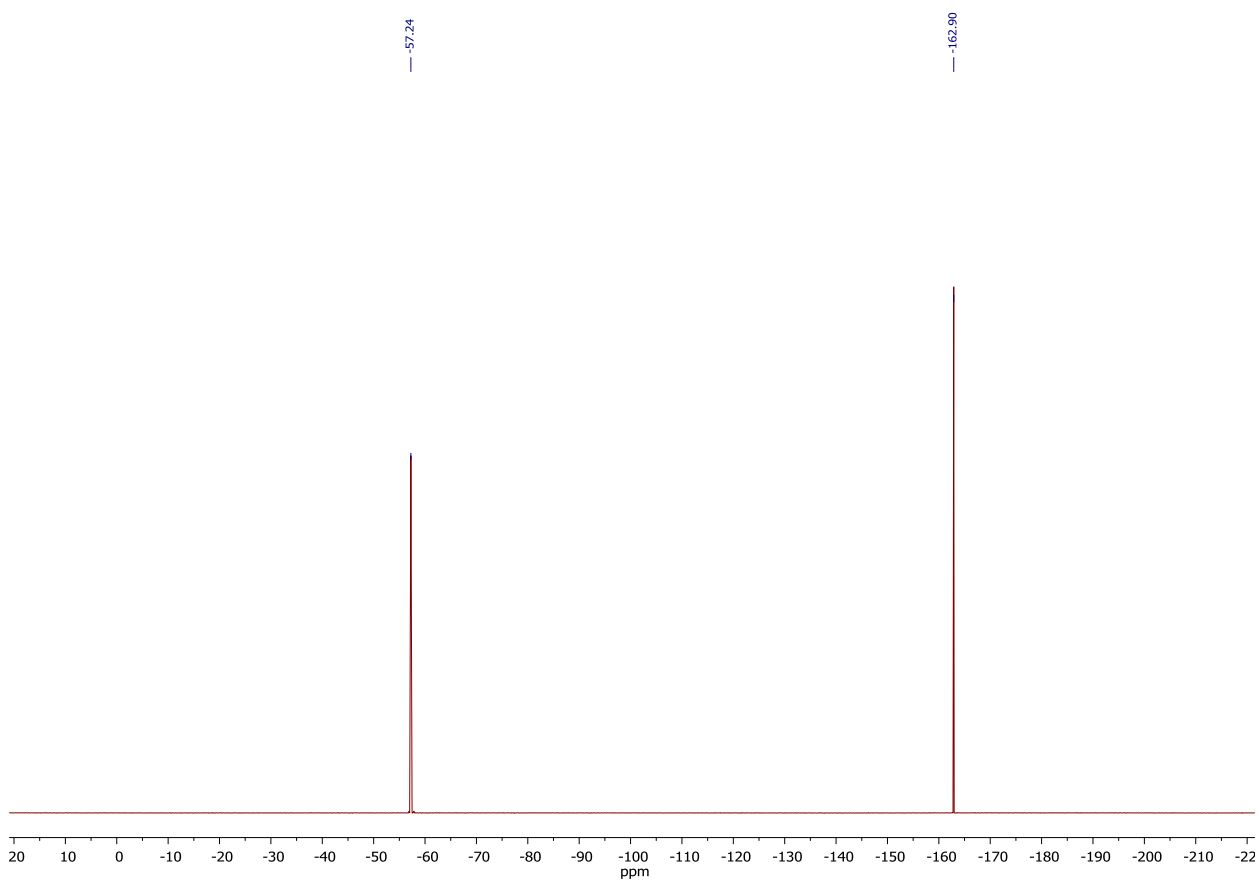

**Figure S12.**  $^{19}\text{F}\{^1\text{H}\}$  NMR spectrum of **3d**. Solvent:  $\text{DMSO-}d_6$ , 282.4 MHz. Standard:  $\text{C}_6\text{F}_6$  with respect to  $\text{CFCl}_3$ .

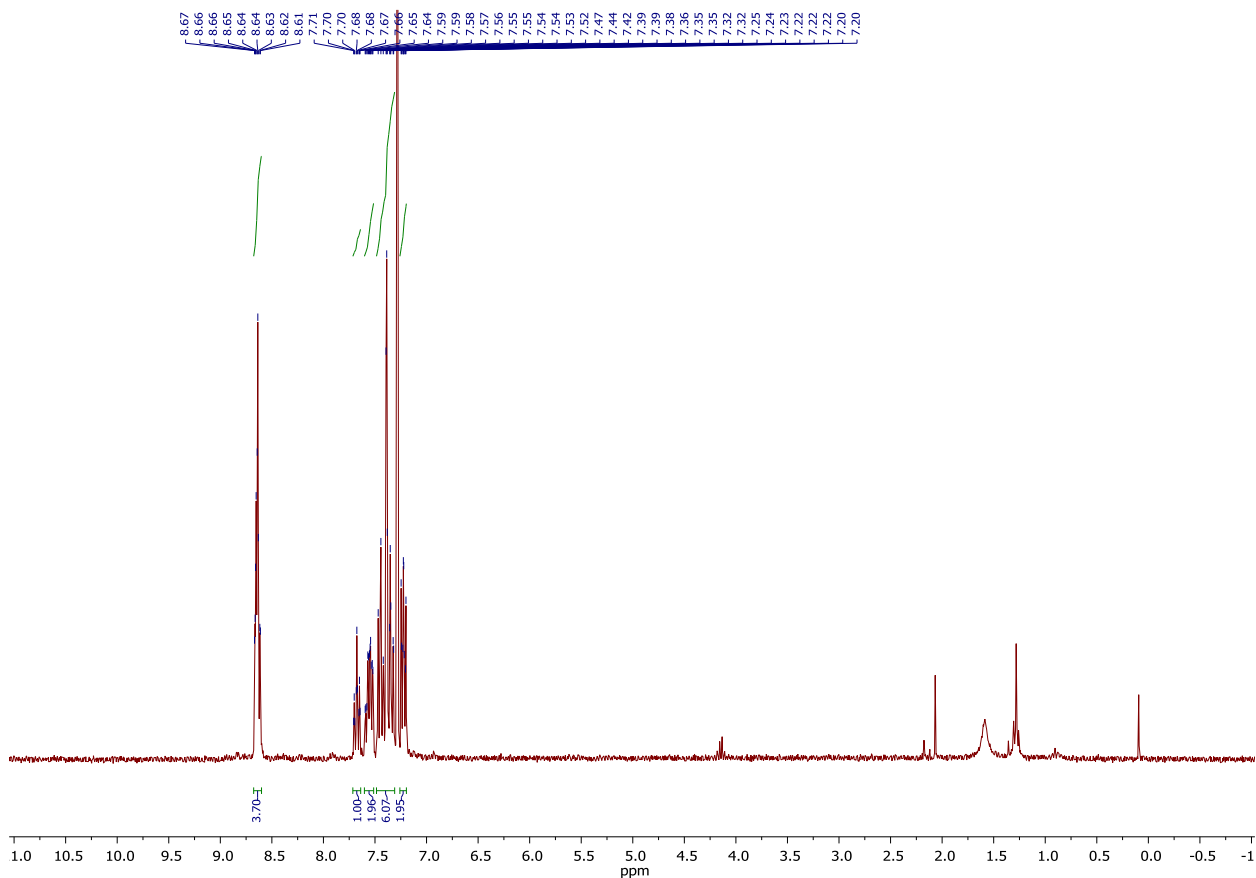

**Figure S13.**  $^1\text{H}$  NMR spectrum of **4a**. Solvent:  $\text{CDCl}_3$ , 300 MHz.

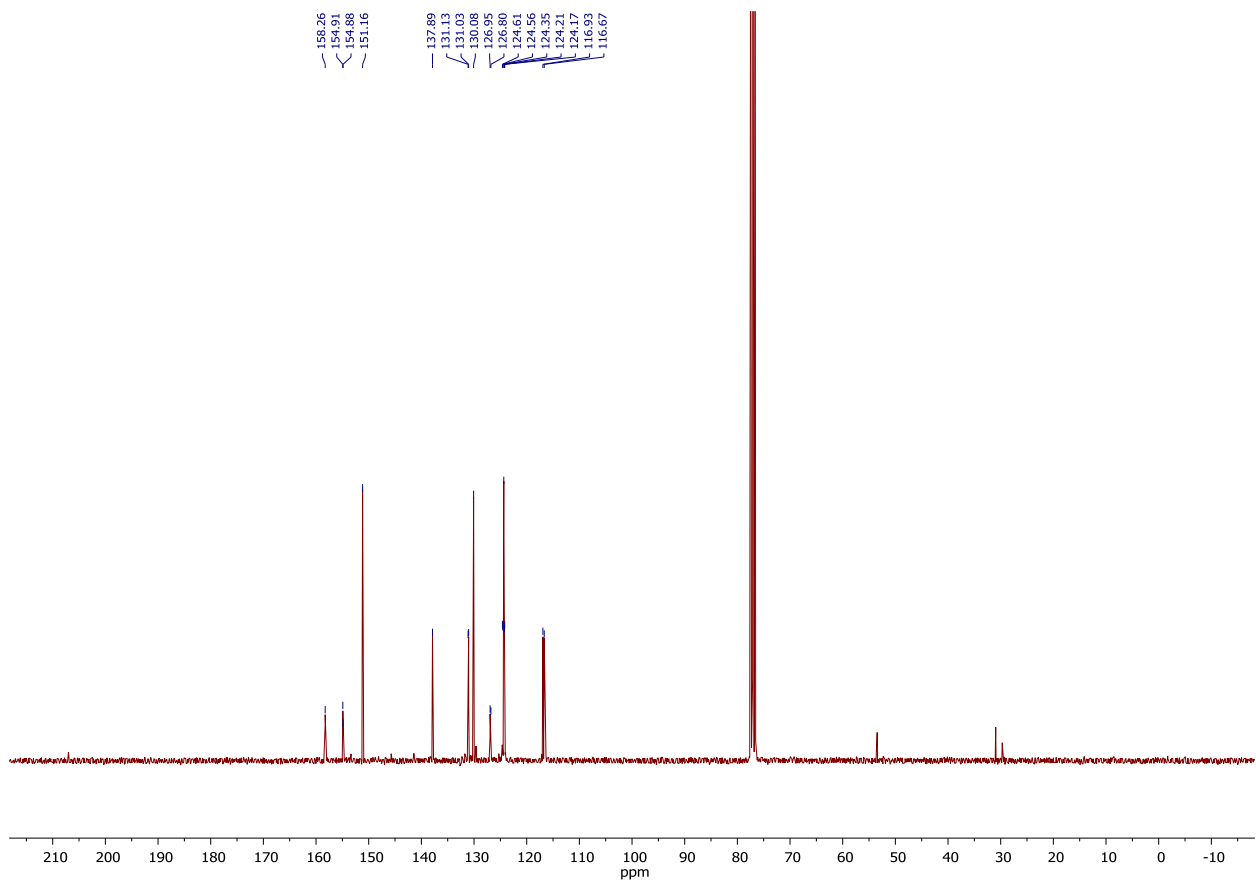

**Figure S14.**  $^{13}\text{C}\{^1\text{H}\}$  NMR spectrum of **4a**. Solvent:  $\text{CDCl}_3$ , 75 MHz.



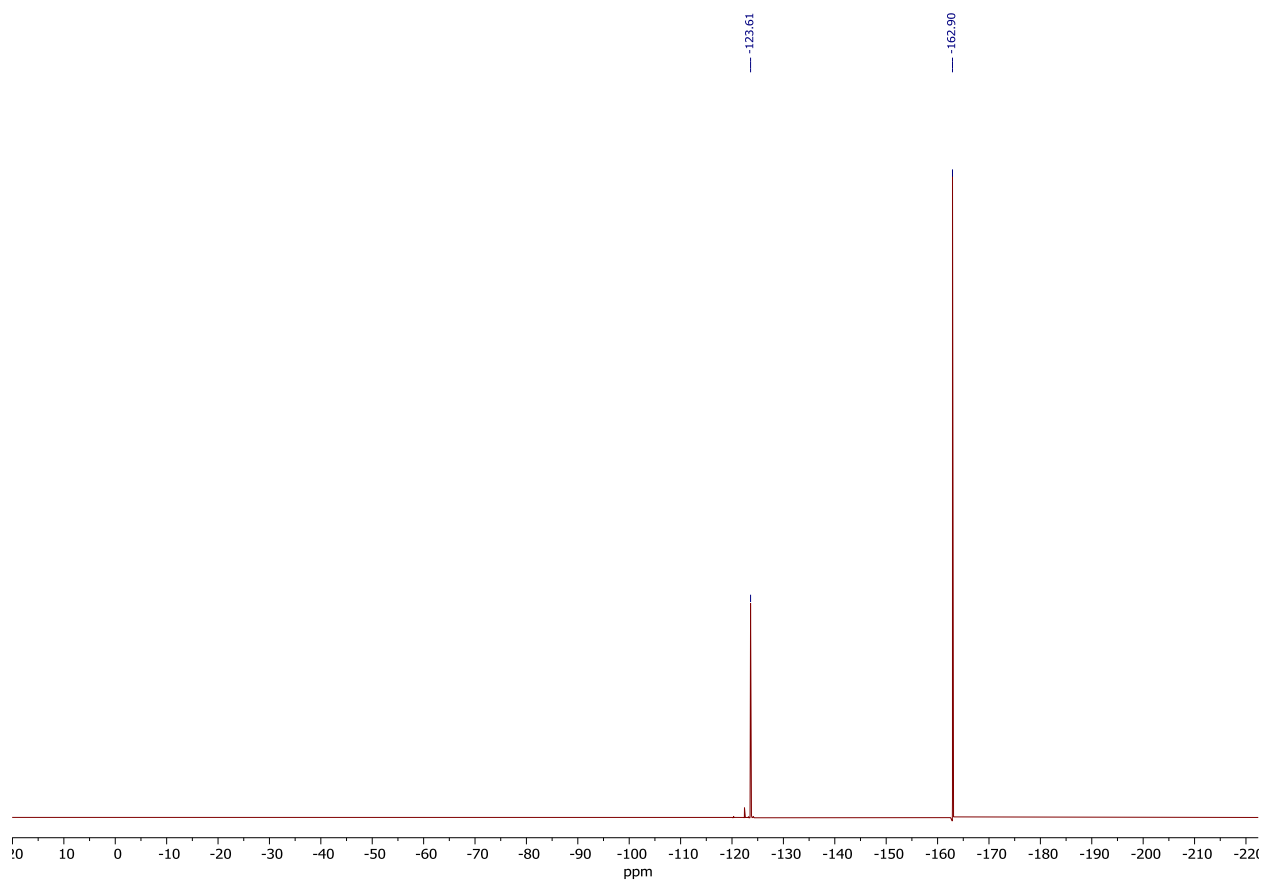

**Figure S15.**  $^{19}\text{F}\{^1\text{H}\}$  NMR spectrum of **4a**. Solvent:  $\text{CDCl}_3$ , 282.4 MHz. Standard:  $\text{C}_6\text{F}_6$  with respect to  $\text{CFCl}_3$ .

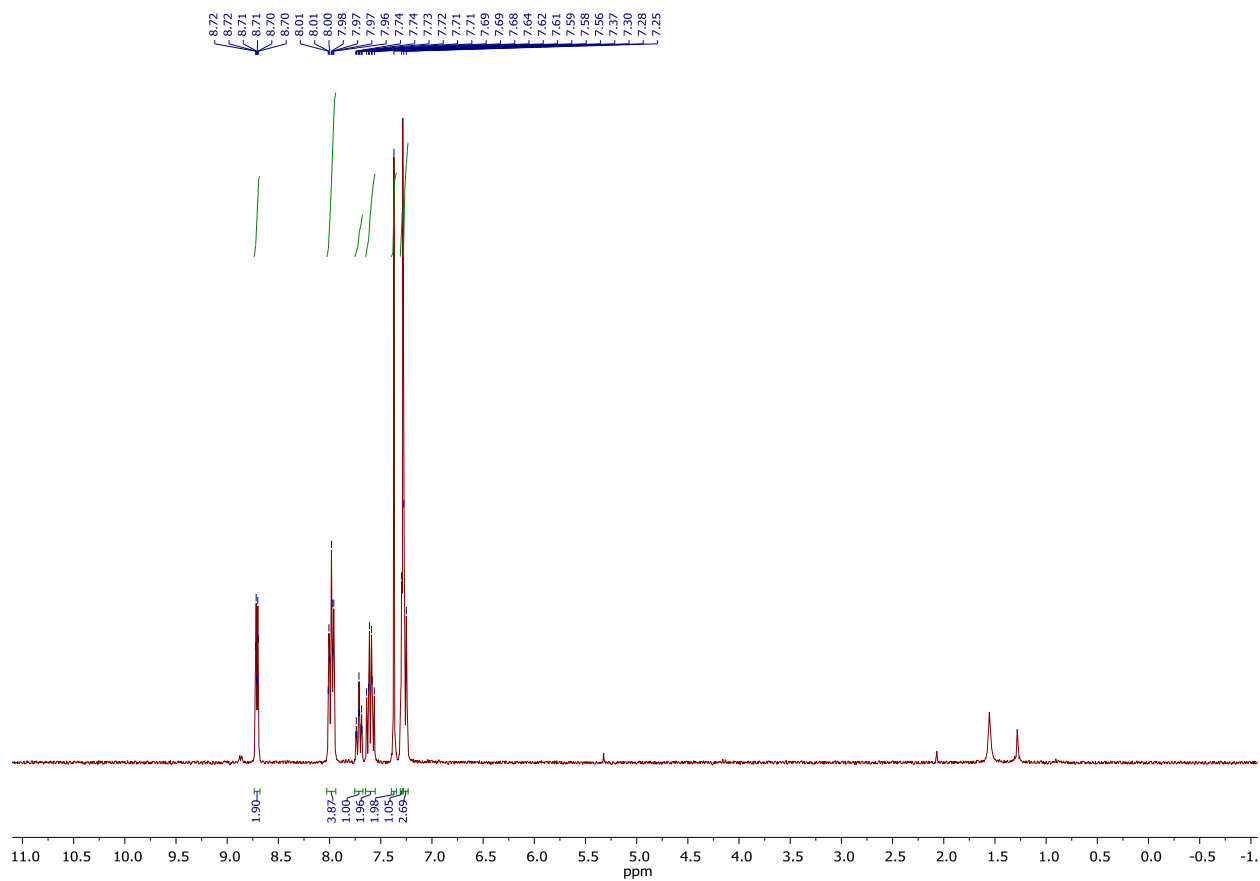

**Figure S16.**  $^1\text{H}$  NMR spectrum of **4b**. Solvent:  $\text{CDCl}_3$ , 300 MHz.

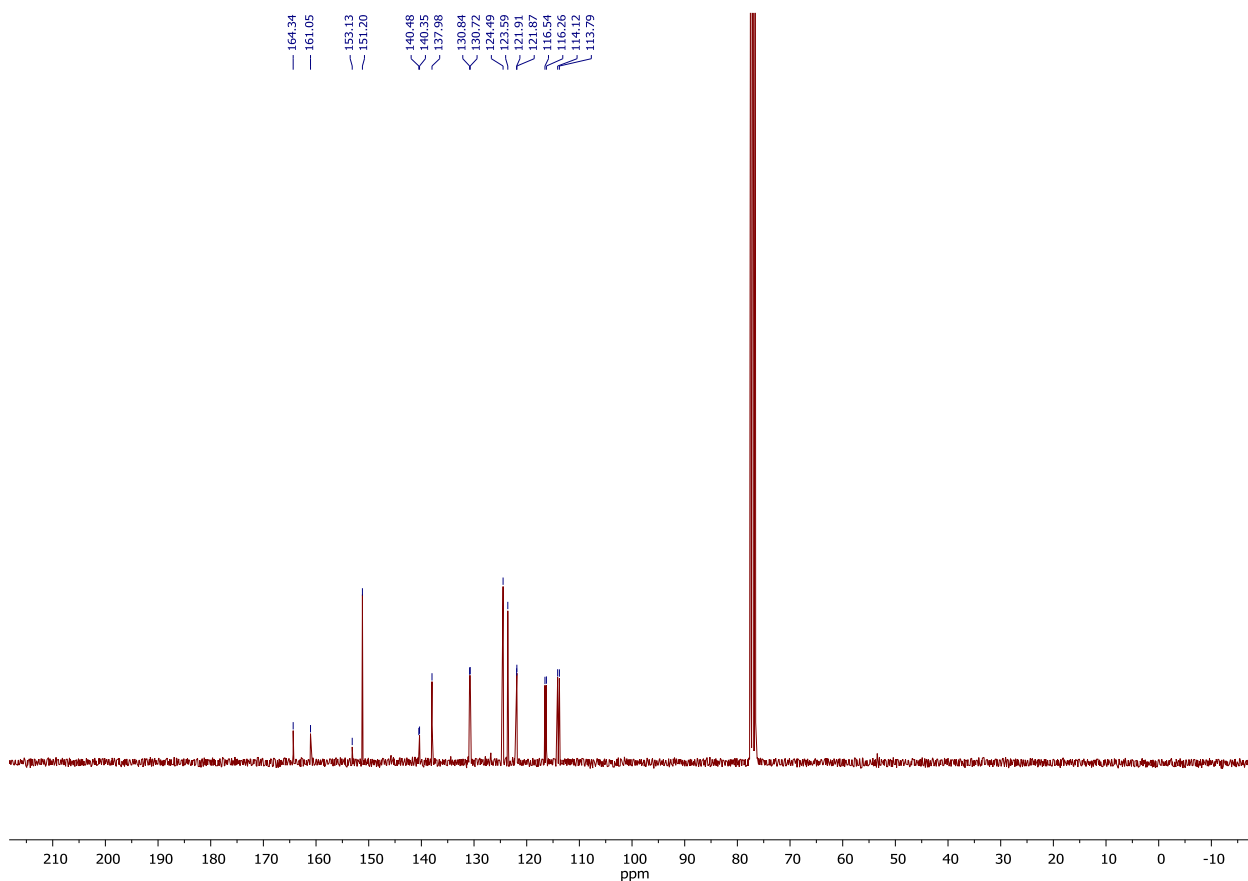

**Figure S17.**  $^{13}\text{C}\{^1\text{H}\}$  NMR spectrum of **4b**. Solvent:  $\text{CDCl}_3$ , 75 MHz.

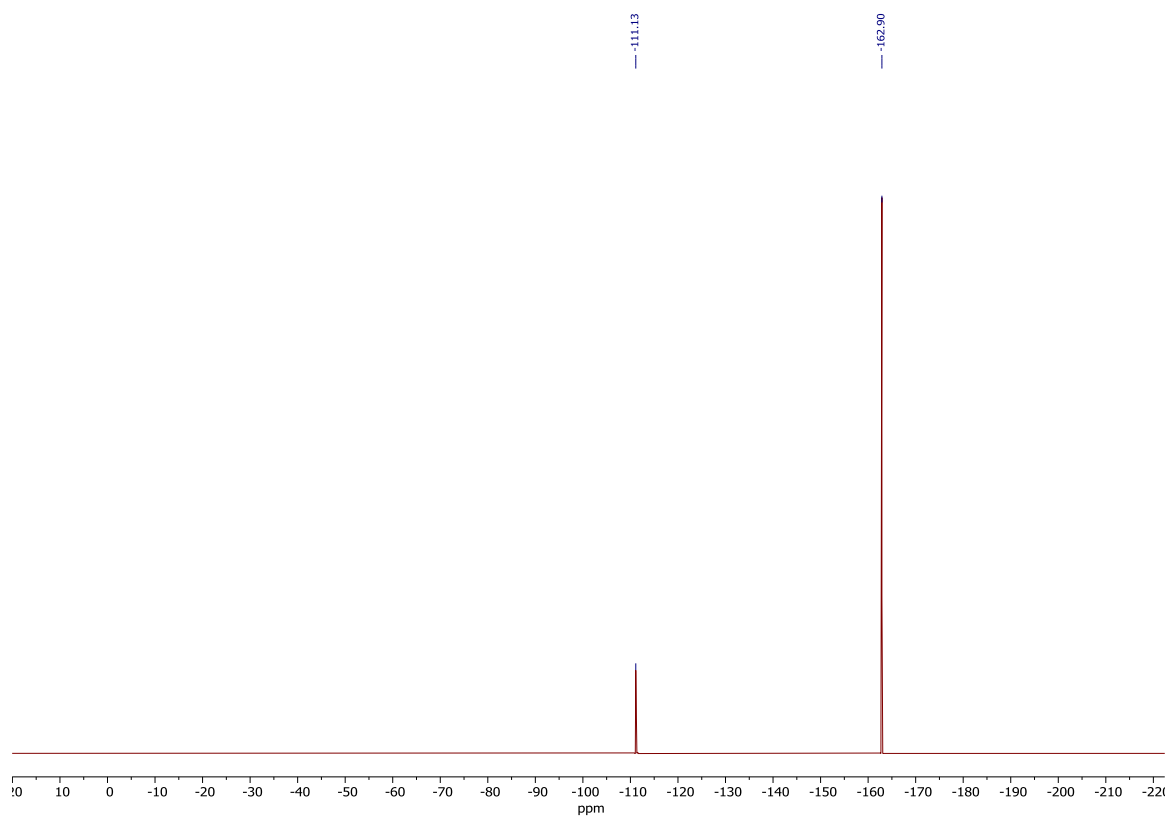

**Figure S18.**  $^{19}\text{F}\{^1\text{H}\}$  NMR spectrum of **4b**. Solvent:  $\text{CDCl}_3$ , 282.4MHz. Standard:  $\text{C}_6\text{F}_6$  with respect to  $\text{CFCl}_3$ .

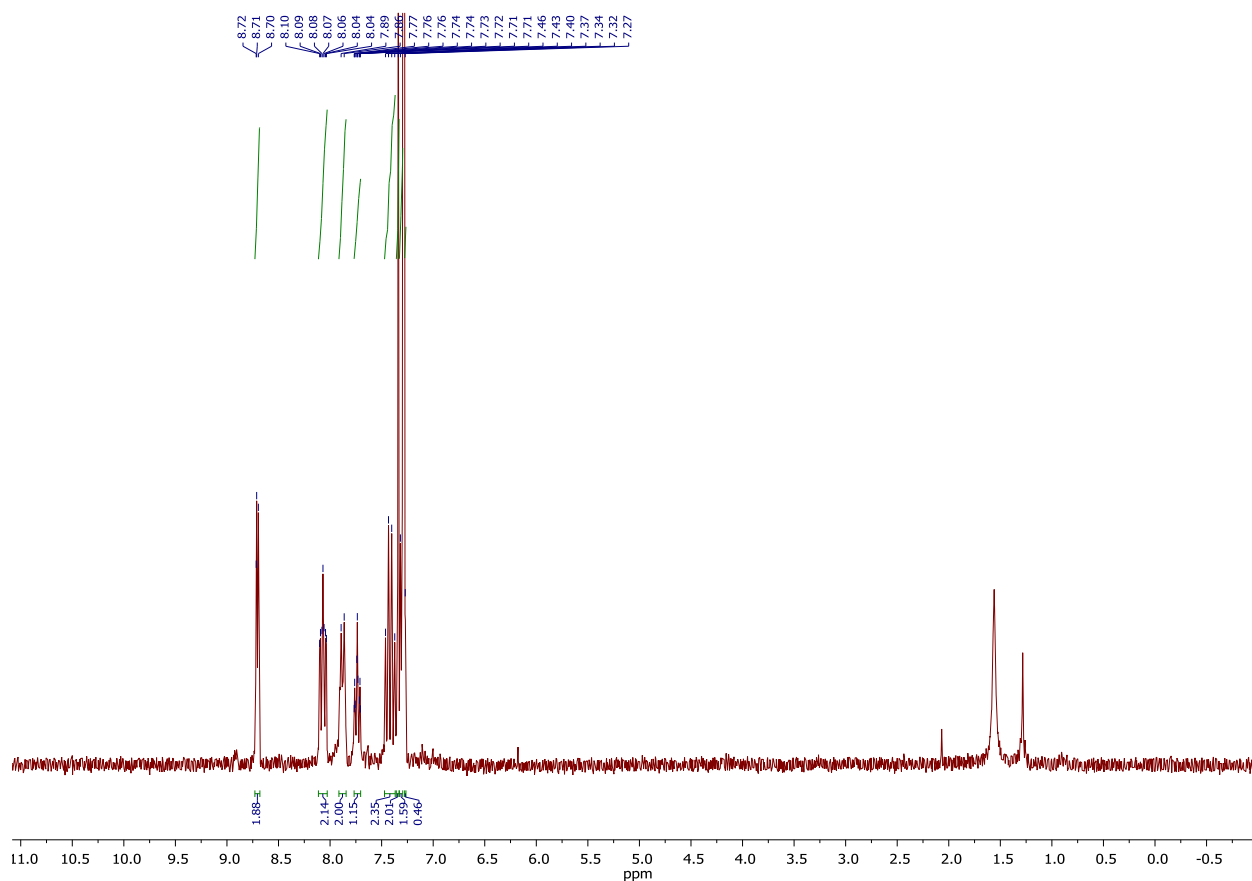

Figure S19.  $^1\text{H}$  NMR spectrum of **4c**. Solvent:  $\text{CDCl}_3$ , 300 MHz.

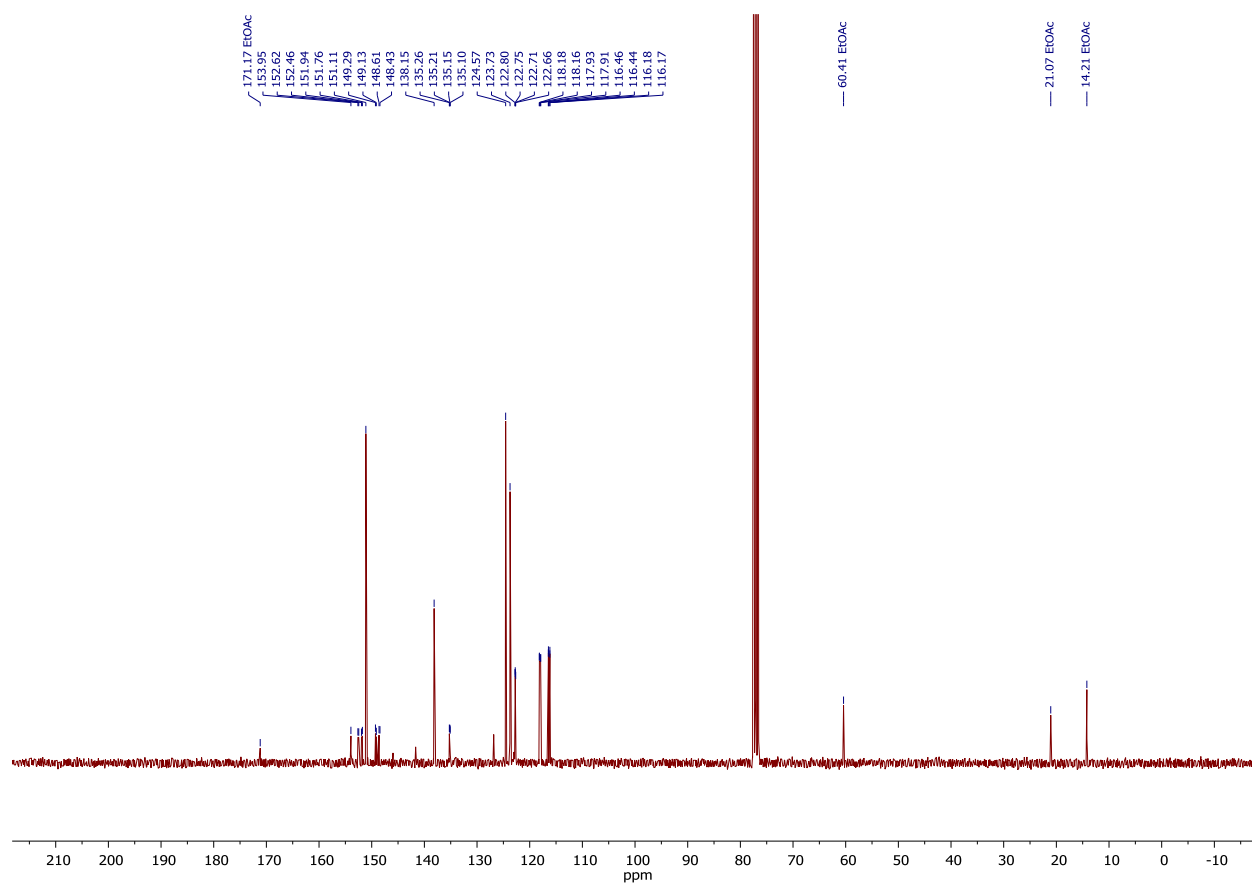

Figure S20.  $^{13}\text{C}\{^1\text{H}\}$  NMR spectrum of **4c**. Solvent:  $\text{CDCl}_3$ , 75 MHz.

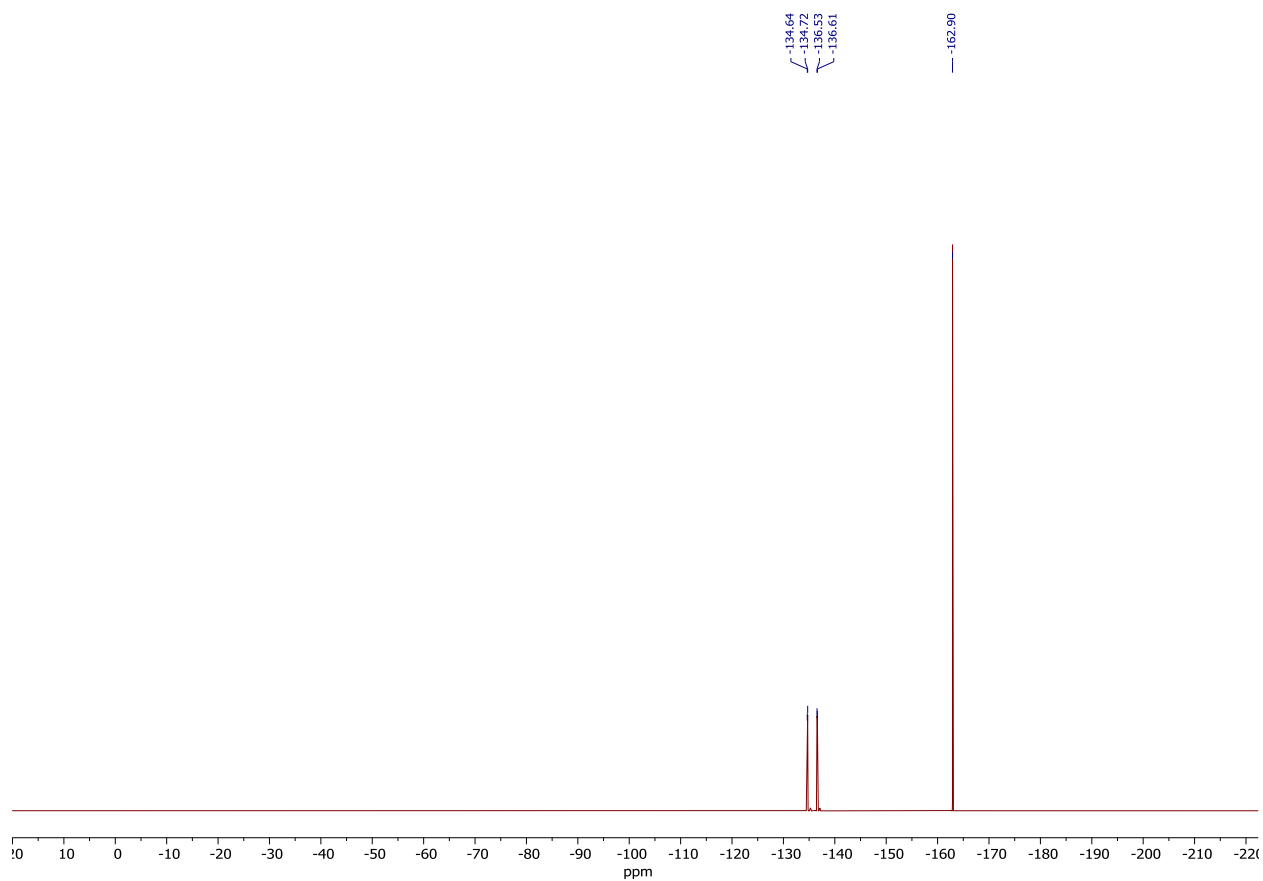

**Figure S21.**  $^{19}\text{F}\{^1\text{H}\}$  NMR spectrum of **4c**. Solvent:  $\text{CDCl}_3$ , 282.4 MHz. Standard:  $\text{C}_6\text{F}_6$  with respect to  $\text{CFCl}_3$ .

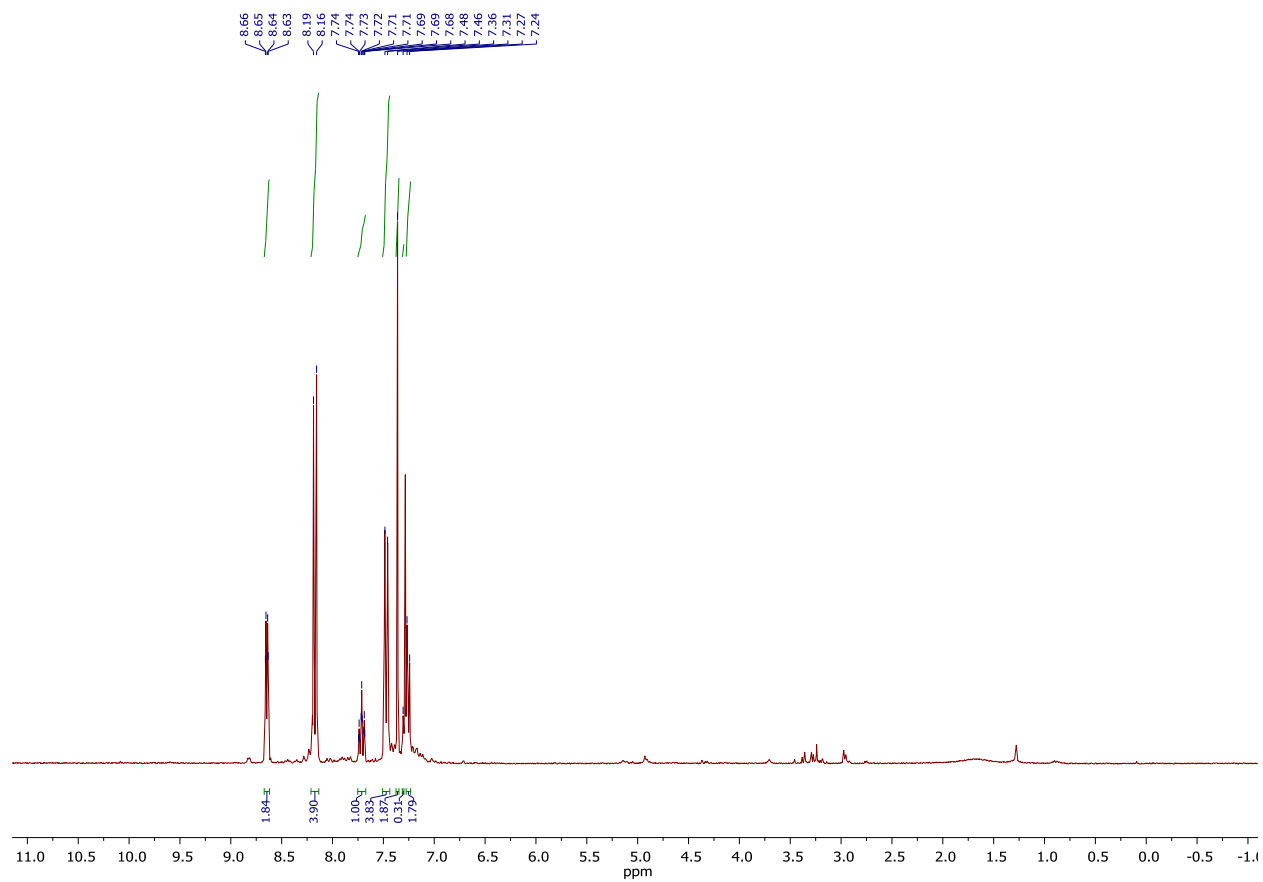

**Figure S22.**  $^1\text{H}$  NMR spectrum of **4d**. Solvent:  $\text{CDCl}_3$ , 300 MHz.

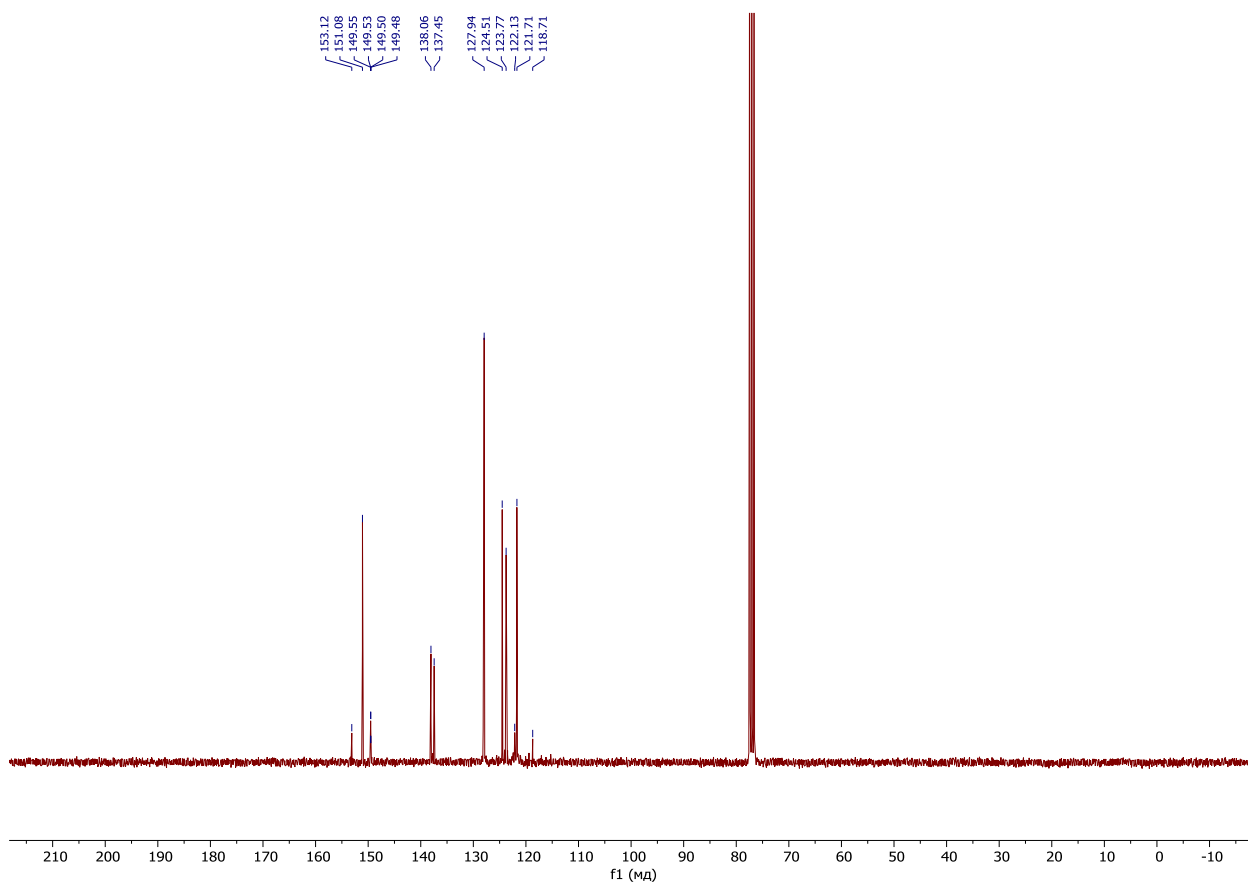

**Figure S23.**  $^{13}\text{C}\{^1\text{H}\}$  NMR spectrum of **4d**. Solvent:  $\text{CDCl}_3$ , 75 MHz.

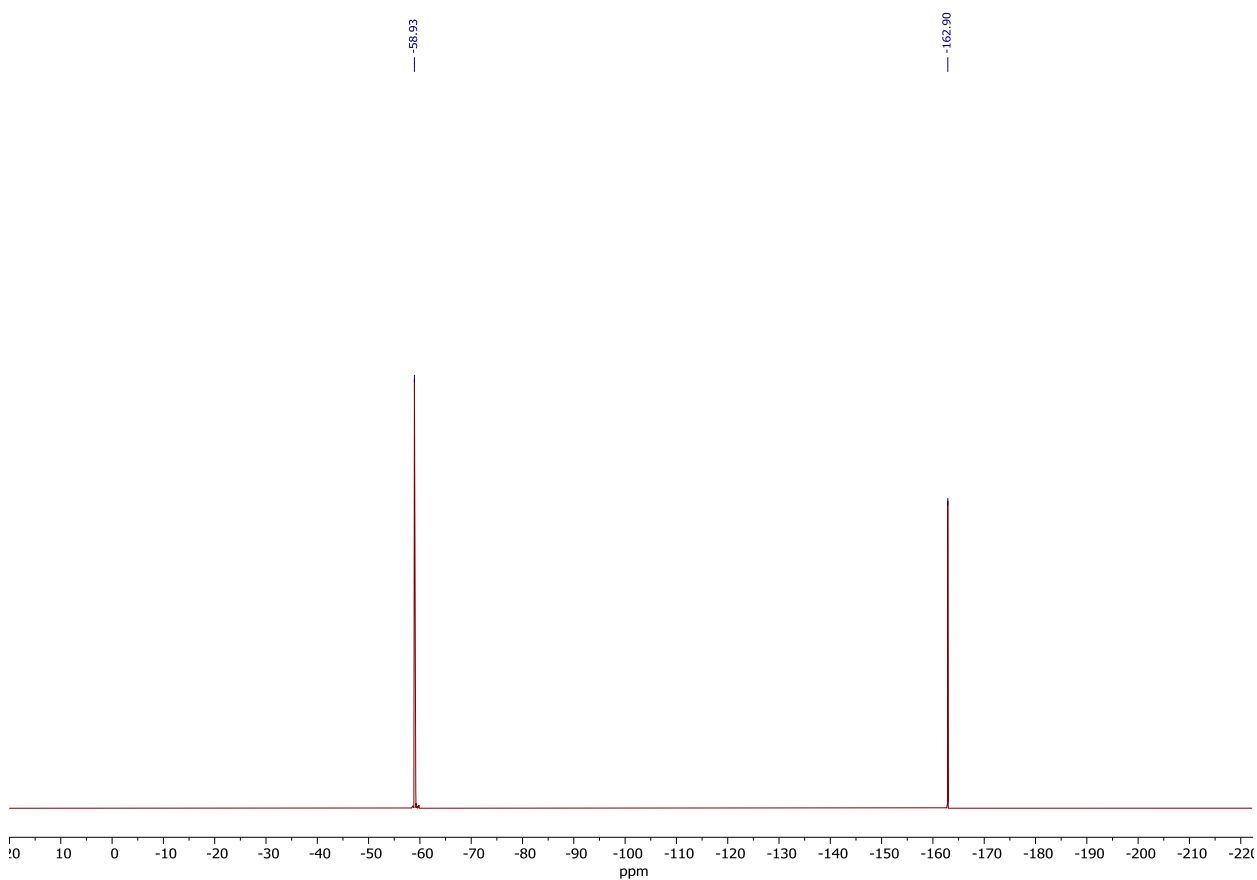

**Figure S24.**  $^{19}\text{F}\{^1\text{H}\}$  NMR spectrum of **4d**. Solvent:  $\text{CDCl}_3$ , 282.4 MHz.. Standard:  $\text{C}_6\text{F}_6$  with respect to  $\text{CFCl}_3$ .

### ESI-HRMS and ESI-UHRMS spectra of the obtained compounds.

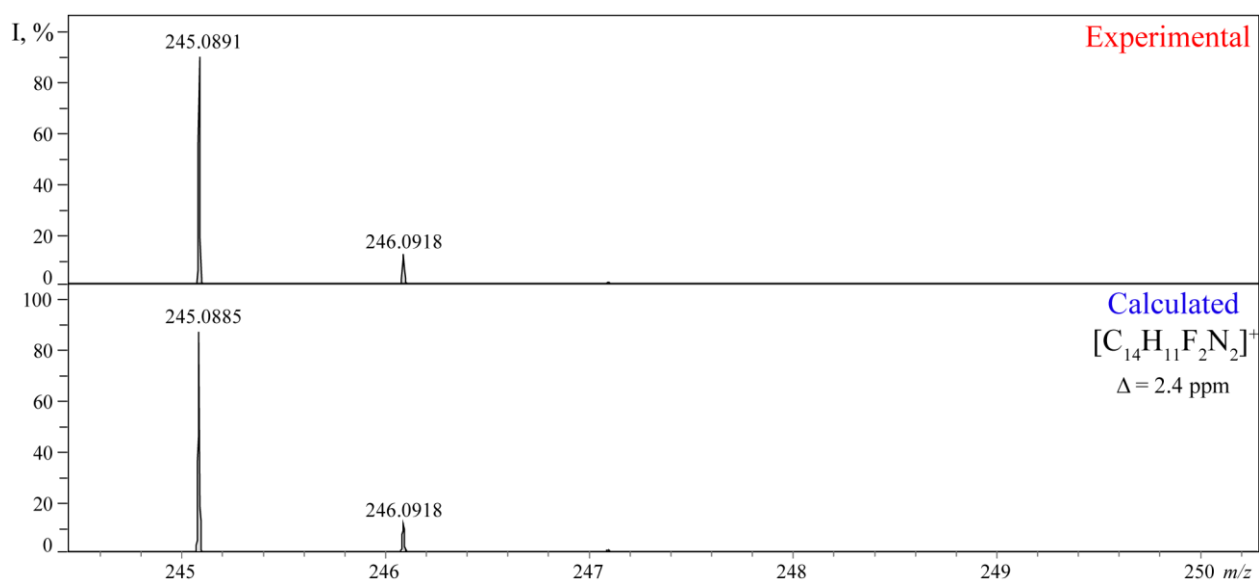

**Figure S25.** Experimental and theoretical ESI-(+)HRMS spectrum of **2a** in CH<sub>3</sub>CN solution: experimental peak  $[M+H]^+ = 245.0891$  Da, calculated for  $C_{14}H_{11}F_2N_2 = 245.0885$ ,  $\Delta = 2.4$  ppm.

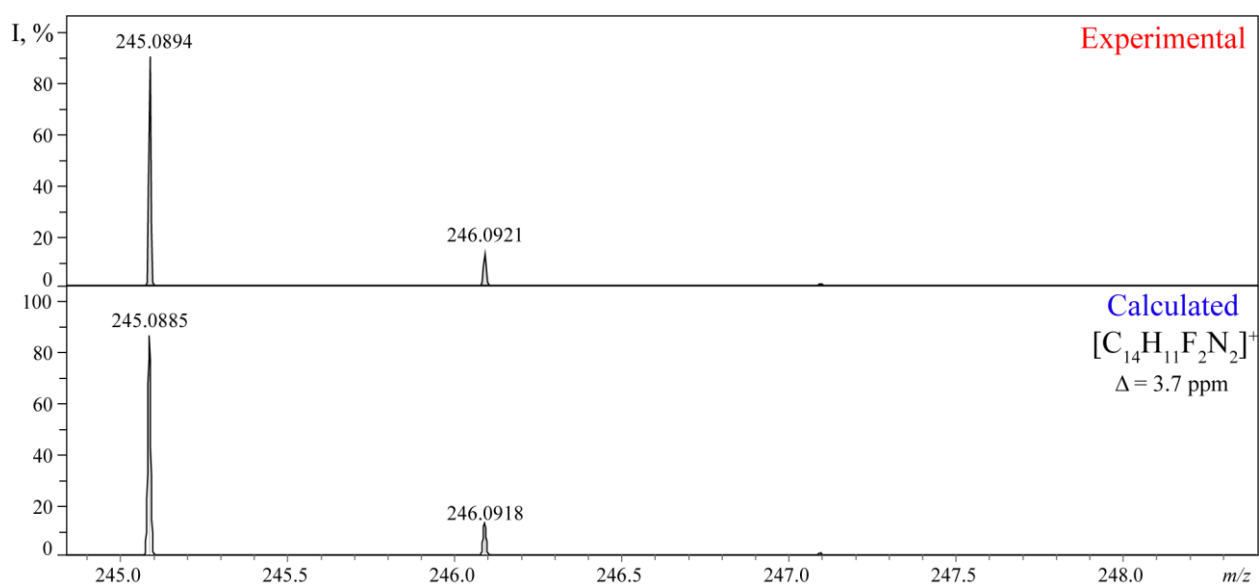

**Figure S26.** Experimental and theoretical ESI-(+)HRMS spectrum of **2b** in CH<sub>3</sub>CN solution: experimental peak  $[M+H]^+ = 245.0894$  Da, calculated for  $C_{14}H_{11}F_2N_2 = 245.0885$ ,  $\Delta = 3.7$  ppm.

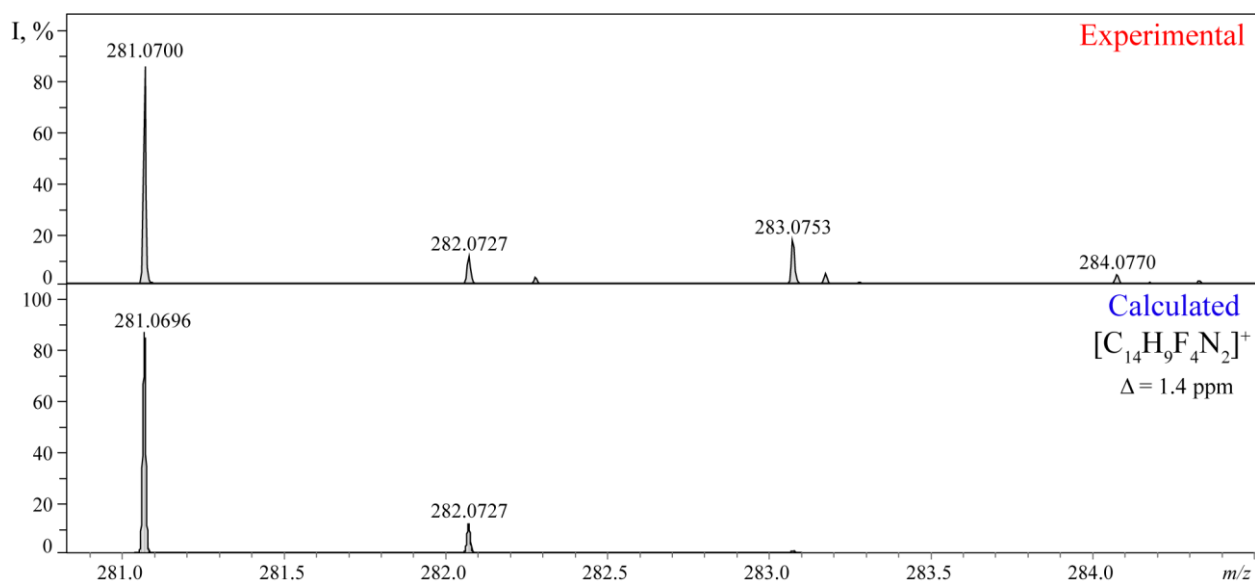

**Figure S27.** Experimental and theoretical ESI-(+)HRMS spectrum of **2c** in CH<sub>3</sub>CN solution: experimental peak  $[M+H]^+ = 281.0700$  Da, calculated for  $C_{14}H_9F_4N_2 = 281.0696$ ,  $\Delta = 1.4$  ppm.

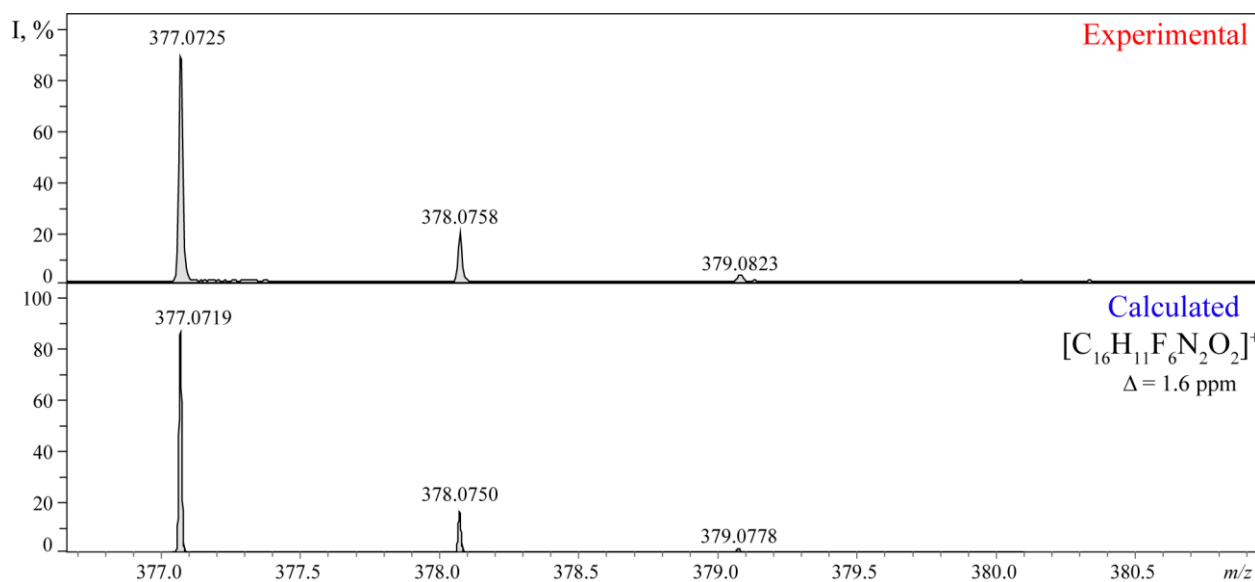

**Figure S28.** Experimental and theoretical ESI-(+)HRMS spectrum of **2d** in CH<sub>3</sub>CN solution: experimental peak  $[M+H]^+ = 377.0725$  Da, calculated for  $C_{16}H_{11}F_6N_2O_2 = 377.0719$ ,  $\Delta = 1.6$  ppm.

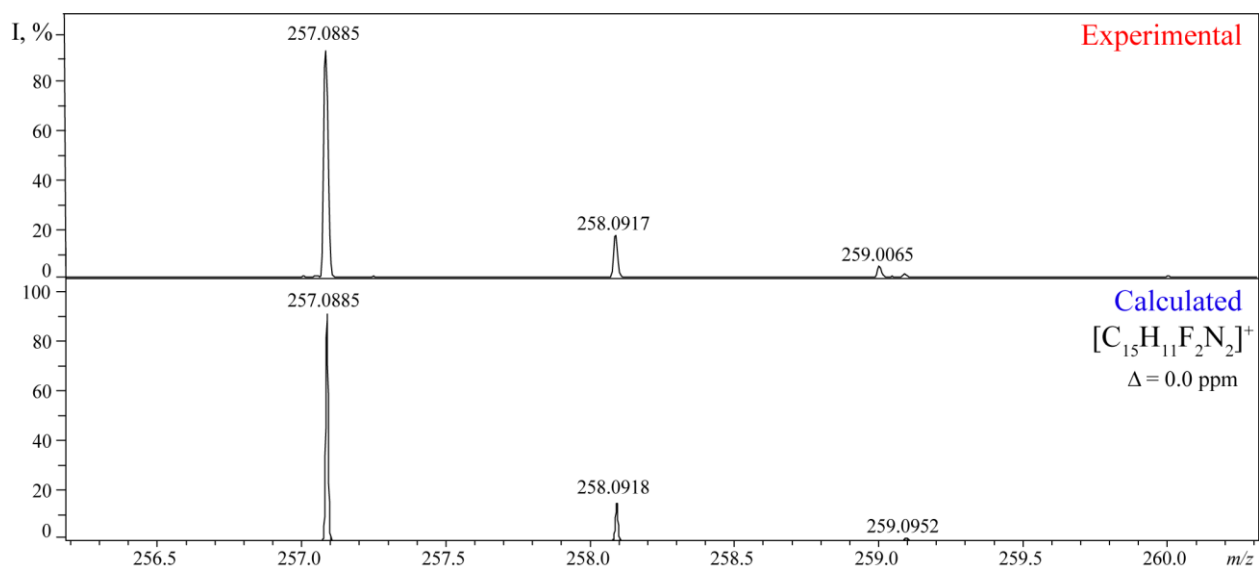

**Figure S29.** Experimental and theoretical ESI-(+)HRMS spectrum of **3a** in CH<sub>3</sub>CN solution: experimental peak  $[M]^+$  = 257.0885 Da, calculated for  $C_{15}H_{11}F_2N_2$  = 257.0885,  $\Delta$  = 0.0 ppm.

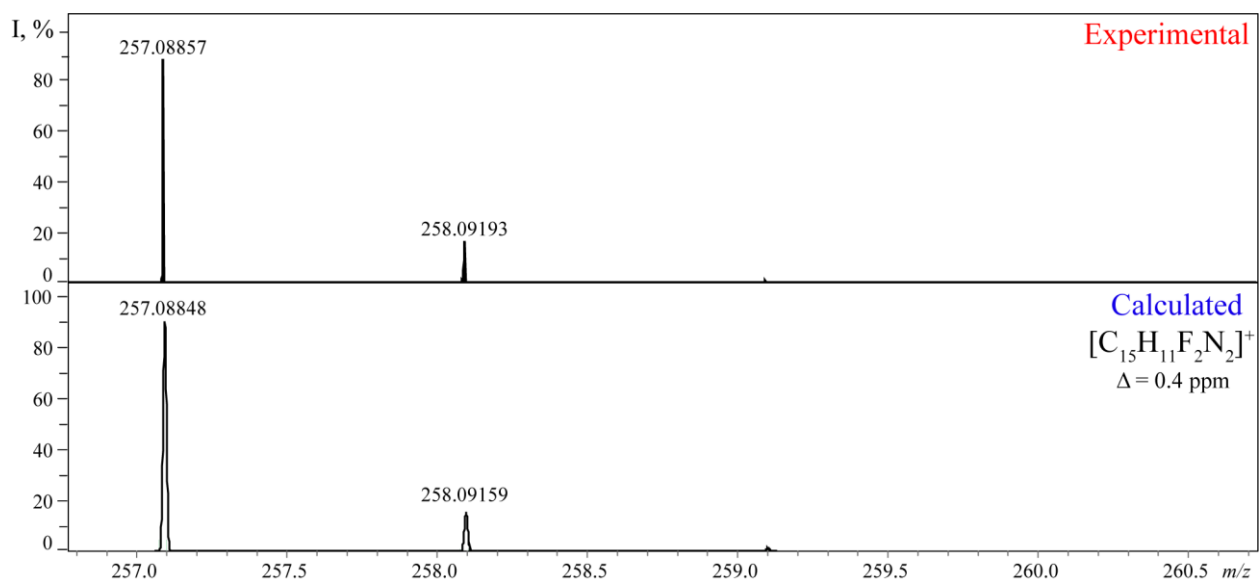

**Figure S30.** Experimental and theoretical ESI-(+)UHRMS spectrum of **3b** in CH<sub>3</sub>CN solution: experimental peak  $[M]^+$  = 257.08857 Da, calculated for  $C_{15}H_{11}F_2N_2$  = 257.08848,  $\Delta$  = 0.4 ppm.



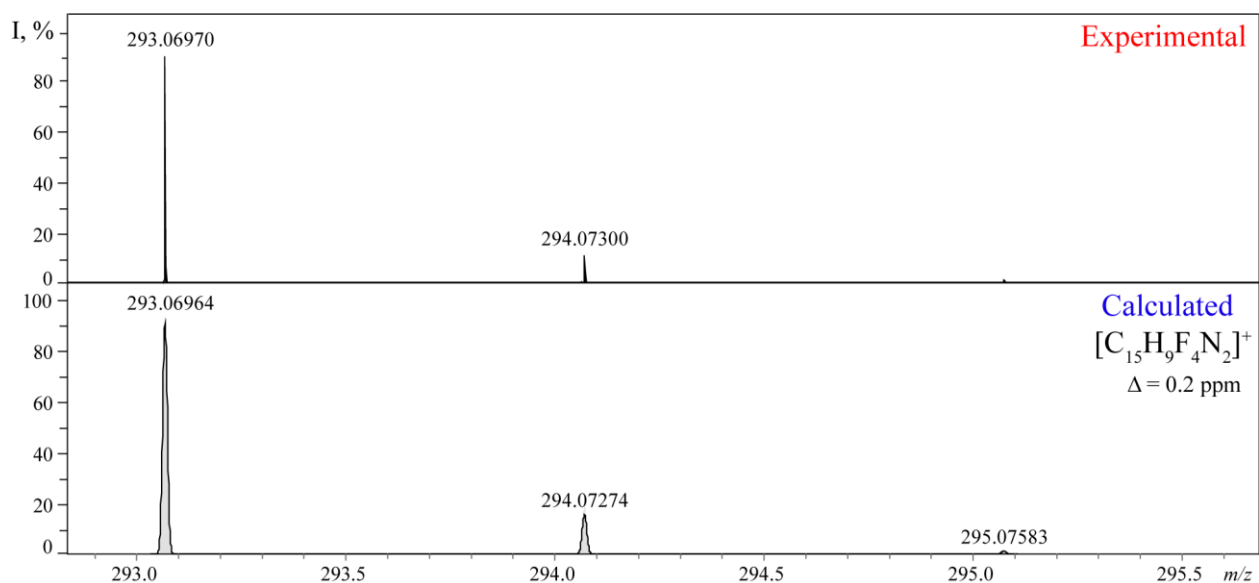

**Figure S31.** Experimental and theoretical ESI-(+)UHRMS spectrum of **3c** in CH<sub>3</sub>CN solution: experimental peak  $[M]^+$  = 293.06970 Da, calculated for  $C_{15}H_9F_4N_2 = 293.06964$ ,  $\Delta = 0.2$  ppm.

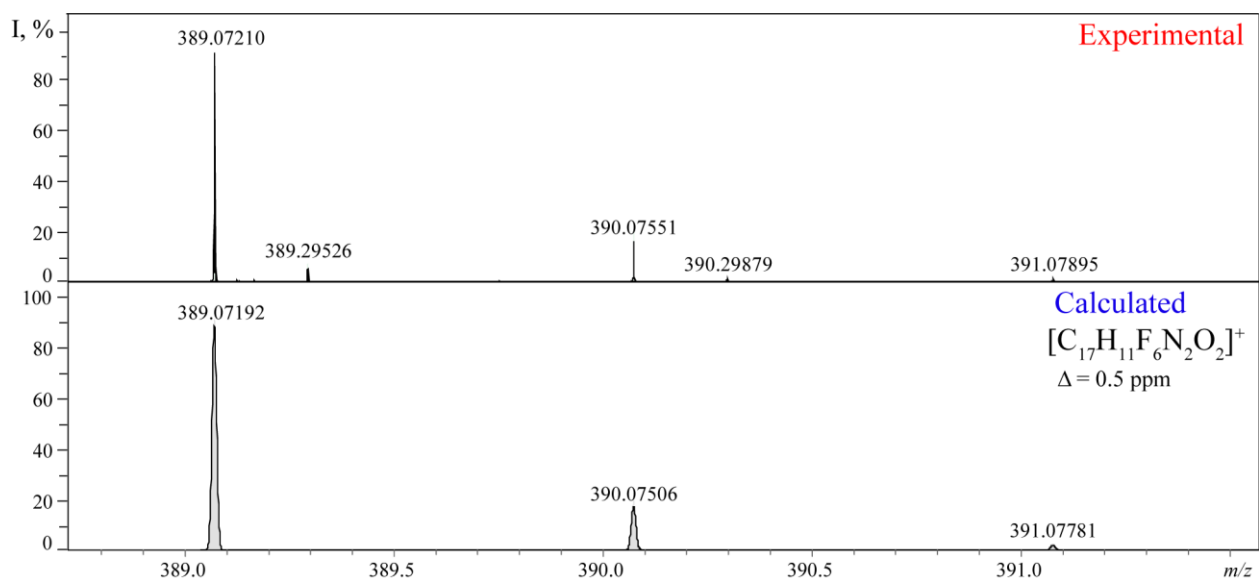

**Figure S32.** Experimental and theoretical ESI-(+)UHRMS spectrum of **3d** in CH<sub>3</sub>CN solution: experimental peak  $[M]^+$  = 389.07210 Da, calculated for  $C_{17}H_{11}F_6N_2O_2 = 389.07192$ ,  $\Delta = 0.5$  ppm.

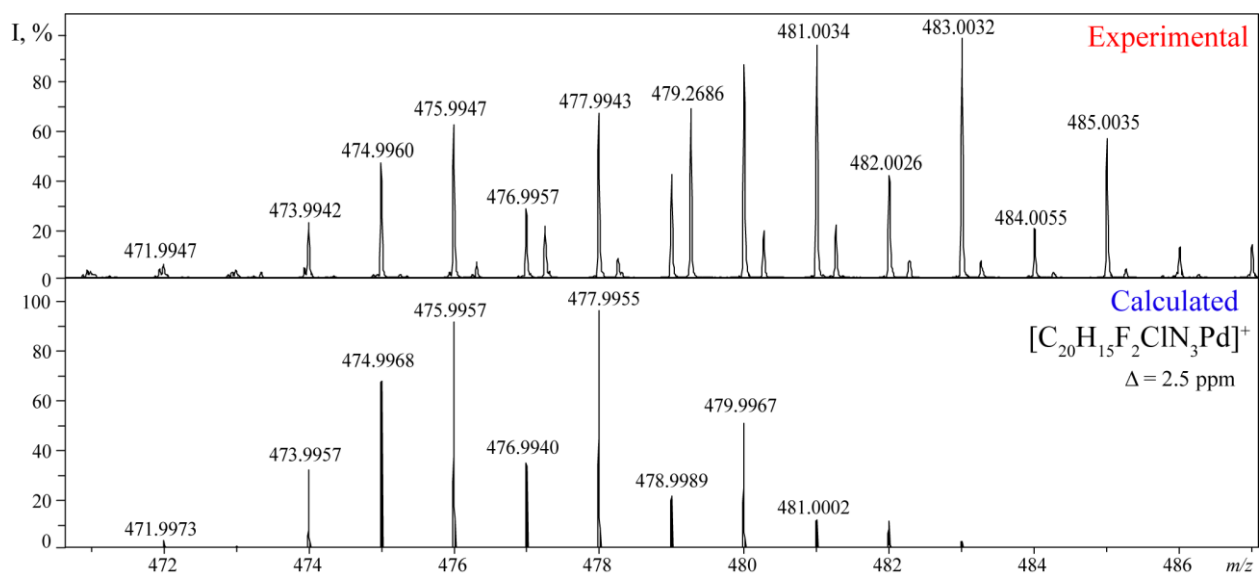

**Figure S33.** Experimental and theoretical ESI-(+)HRMS spectrum of **4a** in CH<sub>3</sub>CN solution: experimental peak [M]<sup>+</sup> = 477.9943 Da, calculated for C<sub>20</sub>H<sub>15</sub>F<sub>2</sub>ClN<sub>3</sub>Pd = 477.9955, Δ = 2.5 ppm.

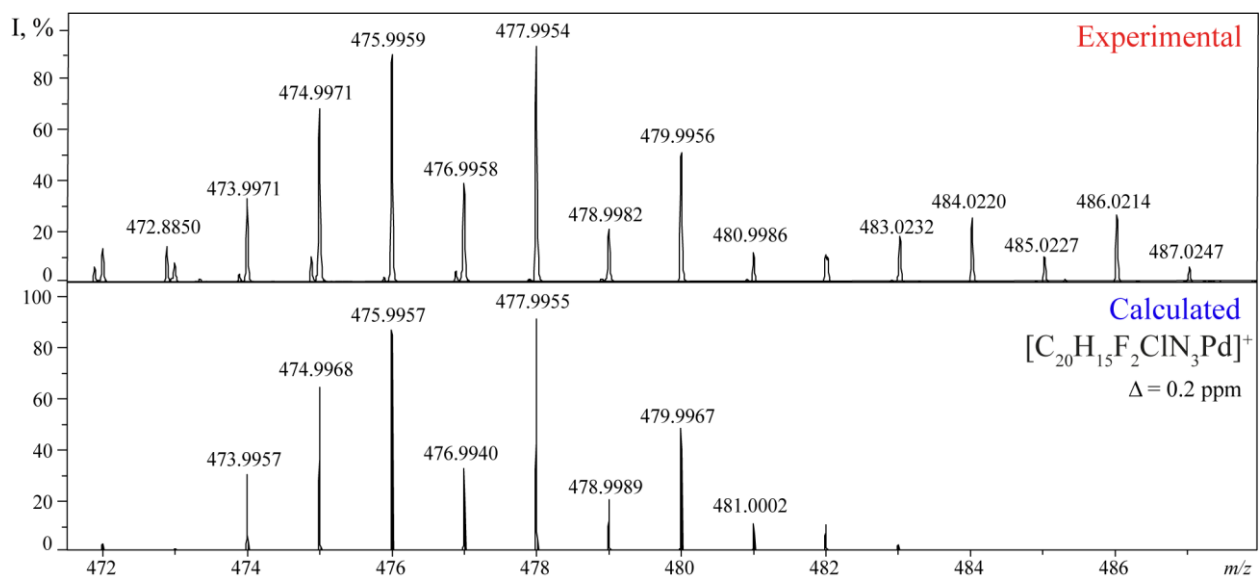

**Figure S34.** Experimental and theoretical ESI-(+)HRMS spectrum of **4b** in CH<sub>3</sub>CN solution: experimental peak [M]<sup>+</sup> = 477.9954 Da, calculated for C<sub>20</sub>H<sub>15</sub>F<sub>2</sub>ClN<sub>3</sub>Pd = 477.9955, Δ = 0.2 ppm.

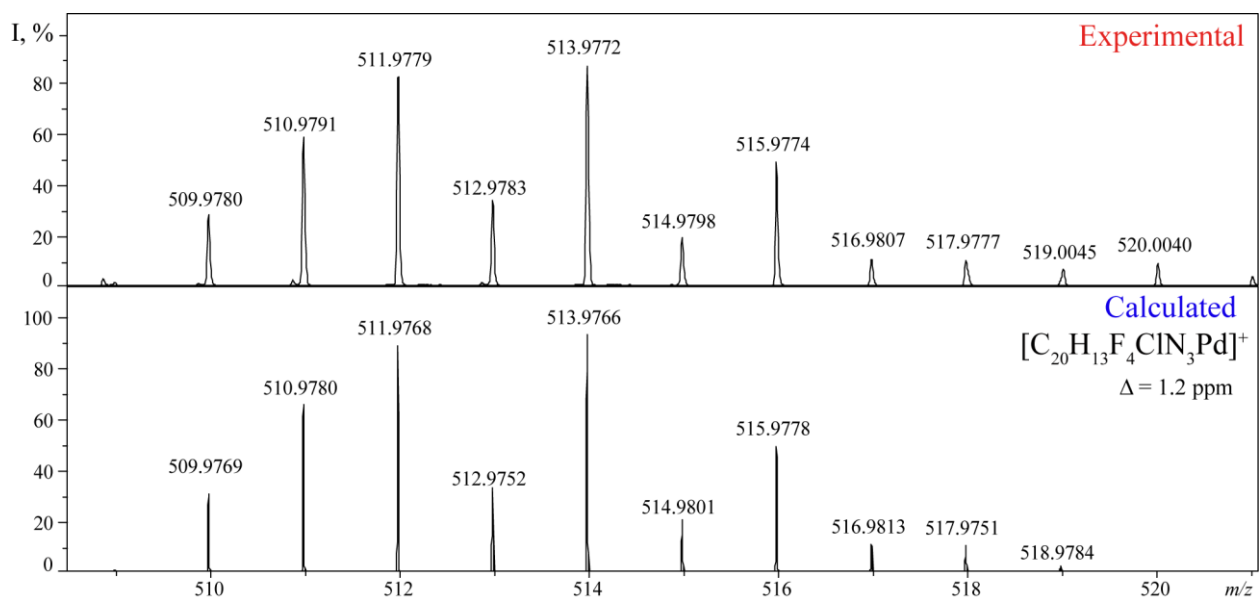

**Figure S35.** Experimental and theoretical ESI-(+)HRMS spectrum of **4c** in CH<sub>3</sub>CN solution: experimental peak [M]<sup>+</sup> = 513.9772 Da, calculated for C<sub>20</sub>H<sub>13</sub>F<sub>4</sub>ClN<sub>3</sub>Pd = 513.9766, Δ = 1.2 ppm.

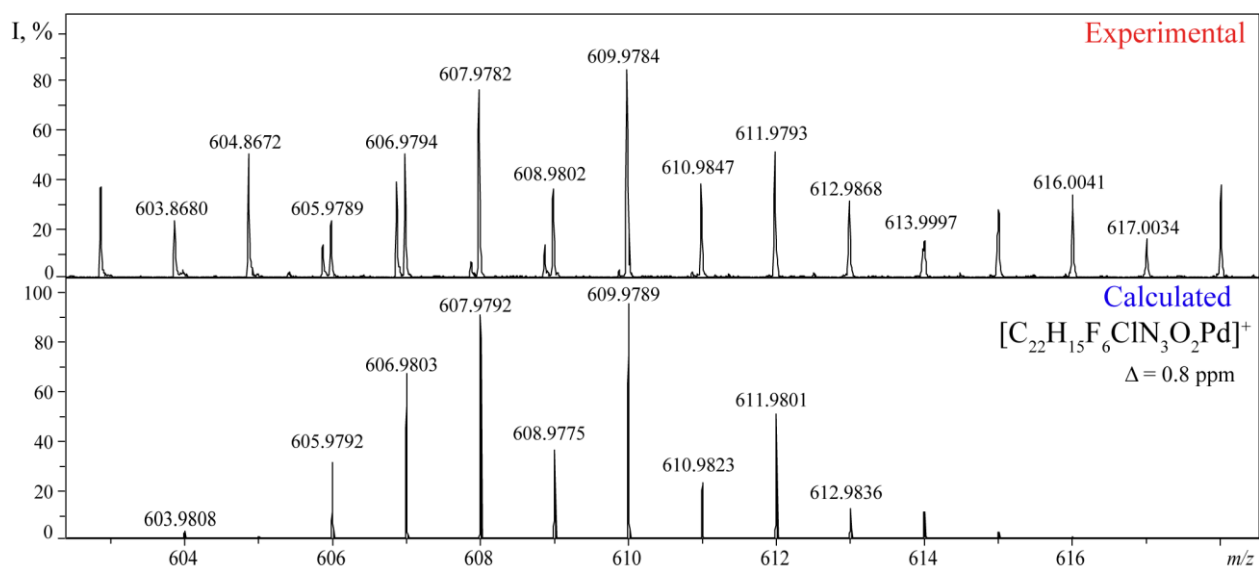

**Figure S36.** Experimental and theoretical ESI-(+)HRMS spectrum of **4d** in CH<sub>3</sub>CN solution: experimental peak [M]<sup>+</sup> = 609.9784 Da, calculated for C<sub>22</sub>H<sub>15</sub>F<sub>6</sub>ClN<sub>3</sub>O<sub>2</sub>Pd = 609.9789, Δ = 0.8 ppm.

## X-ray crystallographic data and refinement details

X-ray diffraction data for **3c**, **4a1**, **4a2**, **4b** and **4c** were collected at 100 K on a Rigaku Synergy S diffractometer equipped with a HyPix6000HE area detector (kappa geometry, shutterless  $\omega$ -scan technique) using monochromatized Cu  $K_{\alpha}$  (**3c**) or Mo  $K_{\alpha}$  (**4a1**, **4a2**, **4b** and **4c**) radiation. The intensity data were integrated and corrected for absorption and decay by the CrysAlisPro program.<sup>1</sup> All structures were solved by direct methods using SHELXT<sup>2</sup> and refined on  $F^2$  using SHELXL-2018<sup>3</sup> in the OLEX2 program.<sup>4</sup> In models **4a1**, **4a2** and **4c**, the positions of all atoms were found from the electron density-difference map; atoms were refined with individual anisotropic (nonhydrogen atoms) or isotropic (hydrogen atoms) displacement parameters. In **2a**, **3c** and highly disordered **4b**, hydrogen atoms were placed in ideal calculated positions and refined as riding atoms with relative isotropic displacement parameters. The XP program of the SHELXTL program suite<sup>5</sup> and the Mercury program<sup>6</sup> were used for molecular graphics herein and in the article, respectively.

### References:

1. CrysAlisPro. Version 1.171.41.106a. *Rigaku Oxford Diffraction*, **2021**.
2. Sheldrick, G. M. SHELXT - Integrated space-group and crystal-structure determination. *Acta Cryst.* **2015**, A71, 3-8. <http://doi.org/10.1107/S2053273314026370>
3. Sheldrick, G. M. Crystal structure refinement with SHELXL. *Acta Cryst.* **2015**, C71, 3-8. <http://doi.org/10.1107/S2053229614024218>
4. Dolomanov O.V. ; Bourhis L.J. ; Gildea R.J. ; Howard J.A.K. ; Puschmann H. OLEX2: a complete structure solution, refinement and analysis program. *J. Appl. Cryst.* **2009**, 42, 229-341. <http://doi.org/10.1107/S0021889808042726>
5. Bruker. APEX-III. *Bruker AXS Inc.*, Madison, Wisconsin, USA, **2019**.
6. Macrae, C. F.; Sovago, I.; Cottrell, S. J.; Galek, P. T. A.; McCabe, P.; Pidcock, E.; Platings, M.; Shields, G. P.; Stevens, J. S.; Towler, M.; Wood, P. A. Mercury 4.0: from visualization to analysis, design and prediction. *J. Appl. Cryst.* 2020, **53**, 226-235. <https://doi.org/10.1107/S1600576719014092>

**Table S1.** Crystal data, data collection and structure refinement details

| Identification code                | <b>3c</b>                                                      | <b>4a1</b>                                                                       | <b>4a2</b>                                                                       | <b>4b</b>                                                                        | <b>4c·½CH<sub>2</sub>Cl<sub>2</sub></b>                                            |
|------------------------------------|----------------------------------------------------------------|----------------------------------------------------------------------------------|----------------------------------------------------------------------------------|----------------------------------------------------------------------------------|------------------------------------------------------------------------------------|
| Empirical formula                  | C <sub>15</sub> H <sub>9</sub> ClF <sub>4</sub> N <sub>2</sub> | C <sub>20</sub> H <sub>15</sub> Cl <sub>2</sub> F <sub>2</sub> N <sub>3</sub> Pd | C <sub>20</sub> H <sub>15</sub> Cl <sub>2</sub> F <sub>2</sub> N <sub>3</sub> Pd | C <sub>20</sub> H <sub>17</sub> Cl <sub>2</sub> F <sub>2</sub> N <sub>3</sub> Pd | C <sub>20.5</sub> H <sub>14</sub> Cl <sub>3</sub> F <sub>4</sub> N <sub>3</sub> Pd |
| Formula weight                     | 328.69                                                         | 512.65                                                                           | 512.65                                                                           | 514.66                                                                           | 591.10                                                                             |
| Temperature (K)                    | 100.0(1)                                                       | 100.0(1)                                                                         | 100.0(1)                                                                         | 100.0(1)                                                                         | 100.0(1)                                                                           |
| Wavelength (Å)                     | 1.54184                                                        | 0.71073                                                                          | 0.71073                                                                          | 0.71073                                                                          | 0.71073                                                                            |
| Crystal system                     | Triclinic                                                      | Orthorhombic                                                                     | Monoclinic                                                                       | Monoclinic                                                                       | Orthorhombic                                                                       |
| Space group                        | P $\bar{1}$                                                    | Pbca                                                                             | P2 <sub>1</sub> /c                                                               | C2/m                                                                             | Pbcn                                                                               |
| Unit cell dimensions               |                                                                |                                                                                  |                                                                                  |                                                                                  |                                                                                    |
| a (Å)                              | 6.44484(8)                                                     | 11.2541(2)                                                                       | 9.4450(2)                                                                        | 6.9092(3)                                                                        | 22.7586(3)                                                                         |
| b (Å)                              | 8.57651(16)                                                    | 14.2448(2)                                                                       | 13.5214(3)                                                                       | 14.7924(6)                                                                       | 7.15170(10)                                                                        |
| c (Å)                              | 12.8743(2)                                                     | 24.6718(3)                                                                       | 31.7529(7)                                                                       | 9.9257(6)                                                                        | 26.0618(4)                                                                         |
| $\alpha$ (°)                       | 96.2904(15)                                                    | 90                                                                               | 90                                                                               | 90                                                                               | 90                                                                                 |
| $\beta$ (°)                        | 100.2456(13)                                                   | 90                                                                               | 93.913(2)                                                                        | 96.106(5)                                                                        | 90                                                                                 |
| $\gamma$ (°)                       | 94.1463(12)                                                    | 90                                                                               | 90                                                                               | 90                                                                               | 90                                                                                 |
| Volume (Å <sup>3</sup> )           | 692.98(2)                                                      | 3955.20(10)                                                                      | 4045.70(15)                                                                      | 1008.69(9)                                                                       | 4241.89(10)                                                                        |
| Z                                  | 2                                                              | 8                                                                                | 8                                                                                | 2                                                                                | 8                                                                                  |
| Calcd density (g/cm <sup>3</sup> ) | 1.575                                                          | 1.722                                                                            | 1.683                                                                            | 1.695                                                                            | 1.851                                                                              |
| $\mu$ (mm <sup>-1</sup> )          | 2.867                                                          | 1.237                                                                            | 1.210                                                                            | 1.213                                                                            | 1.302                                                                              |
| F(000)                             | 332                                                            | 2032                                                                             | 2032                                                                             | 512                                                                              | 2328                                                                               |
| Crystal size (mm)                  | 0.16 x 0.08 x 0.05                                             | 0.25 x 0.16 x 0.12                                                               | 0.24 x 0.21 x 0.15                                                               | 0.16 x 0.14 x 0.09                                                               | 0.15 x 0.08 x 0.06                                                                 |
| $\theta$ range (°)                 | 3.516-79.572                                                   | 2.450-34.992                                                                     | 2.161-35.000                                                                     | 2.754-32.493                                                                     | 2.376-35.498                                                                       |

**Table S1.** Crystal data, data collection and structure refinement details (cont.)

| Identification code                                                                | <b>3c</b>                              | <b>4a1</b>                               | <b>4a2</b>                               | <b>4b</b>                               | <b>4c</b> ·½CH <sub>2</sub> Cl <sub>2</sub> |
|------------------------------------------------------------------------------------|----------------------------------------|------------------------------------------|------------------------------------------|-----------------------------------------|---------------------------------------------|
| Index ranges                                                                       | -8<=h<=6,<br>-10<=k<=10,<br>-16<=l<=16 | -18<=h<=17,<br>-22<=k<=22,<br>-38<=l<=39 | -14<=h<=14,<br>-11<=k<=21,<br>-47<=l<=48 | -9<=h<=10,<br>-22<=k<=22,<br>-14<=l<=14 | -35<=h<=35,<br>-11<=k<=8,<br>-38<=l<=40     |
| Reflections                                                                        |                                        |                                          |                                          |                                         |                                             |
| collected                                                                          | 8364                                   | 76516                                    | 41826                                    | 9325                                    | 63848                                       |
| independent [R <sub>int</sub> ]                                                    | 8364 [0.0587]                          | 8463 [0.0503]                            | 16449 [0.0279]                           | 1862 [0.0370]                           | 8926 [0.0286]                               |
| observed                                                                           | 7572                                   | 7332                                     | 13781                                    | 1782                                    | 7935                                        |
| Completeness to $\theta_{\text{full}}/\theta_{\text{max}}$                         | 1.000 / 0.998                          | 1.000 / 0.973                            | 0.999 / 0.923                            | 0.999 / 0.984                           | 0.999 / 0.921                               |
| Data / Restraints / parameters                                                     | 8364 / 0 / 200                         | 8463 / 0 / 312                           | 16449 / 0 / 625                          | 1862 / 25 / 148                         | 8926 / 0 / 341                              |
| Goodness-of-fit on $F^2$                                                           | 1.094                                  | 1.023                                    | 1.058                                    | 1.081                                   | 1.039                                       |
| R1 / wR2 [I>2 $\sigma$ (I)]                                                        | 0.0487 / 0.1389                        | 0.0245 / 0.0618                          | 0.0291 / 0.0687                          | 0.0285, 0.0735                          | 0.0234, 0.0558                              |
| R1 / wR2 (all data)                                                                | 0.0521 / 0.1427                        | 0.0306 / 0.0642                          | 0.0383 / 0.0720                          | 0.0297, 0.0741                          | 0.0279, 0.0572                              |
| $\Delta\rho_{\text{max}} / \Delta\rho_{\text{min}}$ ( $\bar{e}$ ·Å <sup>-3</sup> ) | 0.570 / -0.437                         | 0.560 / -0.462                           | 0.875 / -0.668                           | 0.871 / -0.546                          | 0.498 / -0.580                              |
| CCDC number                                                                        | 2131072                                | 2131073                                  | 2131074                                  | 2131075                                 | 2131076                                     |

## The structure of 3c

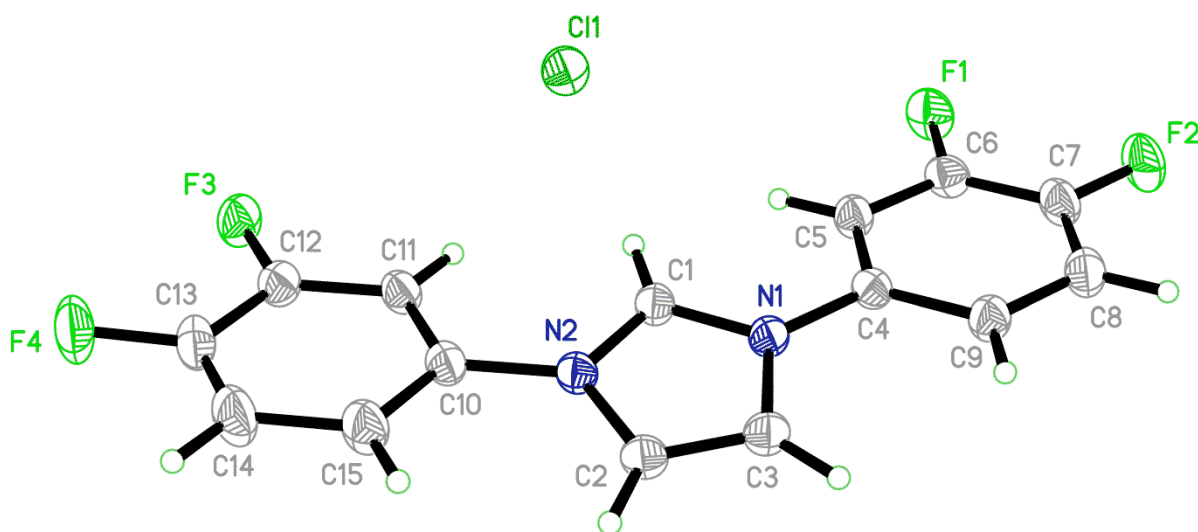

**Fig. S37.** The structure of **3c**.

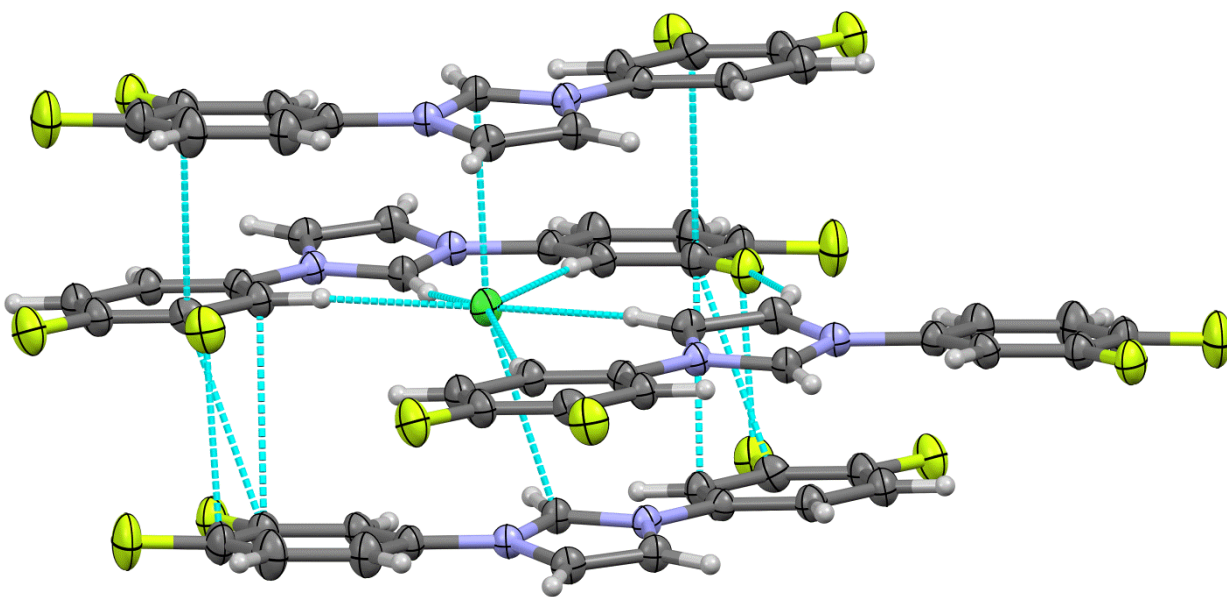

**Fig. S38.** The cations and anions in **3c** form layers with an interlayer distance of 3.22 Å. Short contacts are observed within the layer and between neighboring layers, including classical  $\pi$ - $\pi$  stacking interactions.

**Table S2.** Selected bond distances for **3c** (Å).

| Atoms      | Distance | Atoms      | Distance | Atoms       | Distance |
|------------|----------|------------|----------|-------------|----------|
| F(1)-C(6)  | 1.353(2) | N(2)-C(2)  | 1.387(2) | C(8)-C(9)   | 1.396(3) |
| F(2)-C(7)  | 1.347(2) | N(2)-C(10) | 1.436(2) | C(10)-C(11) | 1.394(3) |
| F(3)-C(12) | 1.352(2) | C(2)-C(3)  | 1.343(3) | C(10)-C(15) | 1.384(3) |
| F(4)-C(13) | 1.352(2) | C(4)-C(5)  | 1.395(3) | C(11)-C(12) | 1.380(3) |

|           |          |           |          |             |          |
|-----------|----------|-----------|----------|-------------|----------|
| N(1)-C(1) | 1.341(2) | C(4)-C(9) | 1.397(3) | C(12)-C(13) | 1.381(3) |
| N(1)-C(3) | 1.392(2) | C(5)-C(6) | 1.374(3) | C(13)-C(14) | 1.368(3) |
| N(1)-C(4) | 1.429(2) | C(6)-C(7) | 1.384(3) | C(14)-C(15) | 1.392(3) |
| N(2)-C(1) | 1.331(2) | C(7)-C(8) | 1.380(3) |             |          |

**Table S3.** Selected bond angles for **3c** (°).

| Atoms           | Angle      | Atoms             | Angle      |
|-----------------|------------|-------------------|------------|
| C(1)-N(1)-C(3)  | 108.34(15) | F(2)-C(7)-C(6)    | 118.92(18) |
| C(1)-N(1)-C(4)  | 125.01(15) | F(2)-C(7)-C(8)    | 121.03(18) |
| C(3)-N(1)-C(4)  | 126.53(16) | C(8)-C(7)-C(6)    | 120.05(18) |
| C(1)-N(2)-C(2)  | 108.57(15) | C(7)-C(8)-C(9)    | 119.56(18) |
| C(1)-N(2)-C(10) | 124.84(16) | C(8)-C(9)-C(4)    | 119.36(18) |
| C(2)-N(2)-C(10) | 126.59(16) | C(11)-C(10)-N(2)  | 118.94(17) |
| N(2)-C(1)-N(1)  | 108.54(16) | C(15)-C(10)-N(2)  | 119.70(18) |
| C(3)-C(2)-N(2)  | 107.53(16) | C(15)-C(10)-C(11) | 121.36(18) |
| C(2)-C(3)-N(1)  | 107.02(16) | C(12)-C(11)-C(10) | 117.65(18) |
| C(5)-C(4)-N(1)  | 118.97(16) | F(3)-C(12)-C(11)  | 119.46(18) |
| C(5)-C(4)-C(9)  | 121.10(18) | F(3)-C(12)-C(13)  | 119.06(17) |
| C(9)-C(4)-N(1)  | 119.93(17) | C(11)-C(12)-C(13) | 121.48(19) |
| C(6)-C(5)-C(4)  | 117.96(17) | F(4)-C(13)-C(14)  | 120.77(19) |
| F(1)-C(6)-C(5)  | 119.03(18) | C(14)-C(13)-C(12) | 120.45(18) |
| F(1)-C(6)-C(7)  | 119.00(18) | C(13)-C(14)-C(15) | 119.62(19) |
| C(5)-C(6)-C(7)  | 121.96(18) | C(10)-C(15)-C(14) | 119.5(2)   |

**Table S4.** Torsion angles for **3c** (°).

| Atoms                  | Angle       | Atoms                | Angle       |
|------------------------|-------------|----------------------|-------------|
| F(1)-C(6)-C(7)-F(2)    | -0.5(3)     | C(3)-N(1)-C(4)-C(9)  | -11.3(3)    |
| F(1)-C(6)-C(7)-C(8)    | -179.88(19) | C(4)-N(1)-C(1)-N(2)  | 176.81(16)  |
| F(2)-C(7)-C(8)-C(9)    | -178.82(19) | C(4)-N(1)-C(3)-C(2)  | -176.59(17) |
| F(3)-C(12)-C(13)-F(4)  | -1.0(3)     | C(4)-C(5)-C(6)-F(1)  | 179.83(18)  |
| F(3)-C(12)-C(13)-C(14) | 179.9(2)    | C(4)-C(5)-C(6)-C(7)  | 1.0(3)      |
| F(4)-C(13)-C(14)-C(15) | -179.4(2)   | C(5)-C(4)-C(9)-C(8)  | 0.0(3)      |
| N(1)-C(4)-C(5)-C(6)    | -179.77(17) | C(5)-C(6)-C(7)-F(2)  | 178.32(18)  |
| N(1)-C(4)-C(9)-C(8)    | 179.29(18)  | C(5)-C(6)-C(7)-C(8)  | -1.1(3)     |
| N(2)-C(2)-C(3)-N(1)    | 0.1(2)      | C(6)-C(7)-C(8)-C(9)  | 0.6(3)      |
| N(2)-C(10)-C(11)-C(12) | -179.05(18) | C(7)-C(8)-C(9)-C(4)  | -0.1(3)     |
| N(2)-C(10)-C(15)-C(14) | 179.2(2)    | C(9)-C(4)-C(5)-C(6)  | -0.5(3)     |
| C(1)-N(1)-C(3)-C(2)    | -0.3(2)     | C(10)-N(2)-C(1)-N(1) | 179.02(16)  |
| C(1)-N(1)-C(4)-C(5)    | -7.7(3)     | C(10)-N(2)-C(2)-C(3) | -179.22(17) |



|                       |             |                         |             |
|-----------------------|-------------|-------------------------|-------------|
| C(1)-N(1)-C(4)-C(9)   | 173.03(18)  | C(10)-C(11)-C(12)-F(3)  | -179.78(17) |
| C(1)-N(2)-C(2)-C(3)   | 0.2(2)      | C(10)-C(11)-C(12)-C(13) | -0.4(3)     |
| C(1)-N(2)-C(10)-C(11) | 10.5(3)     | C(11)-C(10)-C(15)-C(14) | 0.0(3)      |
| C(1)-N(2)-C(10)-C(15) | -168.66(19) | C(11)-C(12)-C(13)-F(4)  | 179.6(2)    |
| C(2)-N(2)-C(1)-N(1)   | -0.4(2)     | C(11)-C(12)-C(13)-C(14) | 0.5(3)      |
| C(2)-N(2)-C(10)-C(11) | -170.11(19) | C(12)-C(13)-C(14)-C(15) | -0.4(4)     |
| C(2)-N(2)-C(10)-C(15) | 10.7(3)     | C(13)-C(14)-C(15)-C(10) | 0.1(4)      |
| C(3)-N(1)-C(1)-N(2)   | 0.5(2)      | C(15)-C(10)-C(11)-C(12) | 0.1(3)      |
| C(3)-N(1)-C(4)-C(5)   | 167.95(18)  |                         |             |

The C<sub>3</sub>N<sub>2</sub>-C<sub>6</sub> dihedral angles are 9.94° for C6=C4..C9 and 10.72° for C6=C10..C14, indicating a higher degree of conjugation.

### The structure of **4a**

Crystallization of **4a** provides two different polymorph modifications, **4a1** and **4a2**.

#### The structure of polymorph **4a1**.

The asymmetric unit of the orthorhombic polymorph modification **4a1** contains one molecule of complex **4a**.

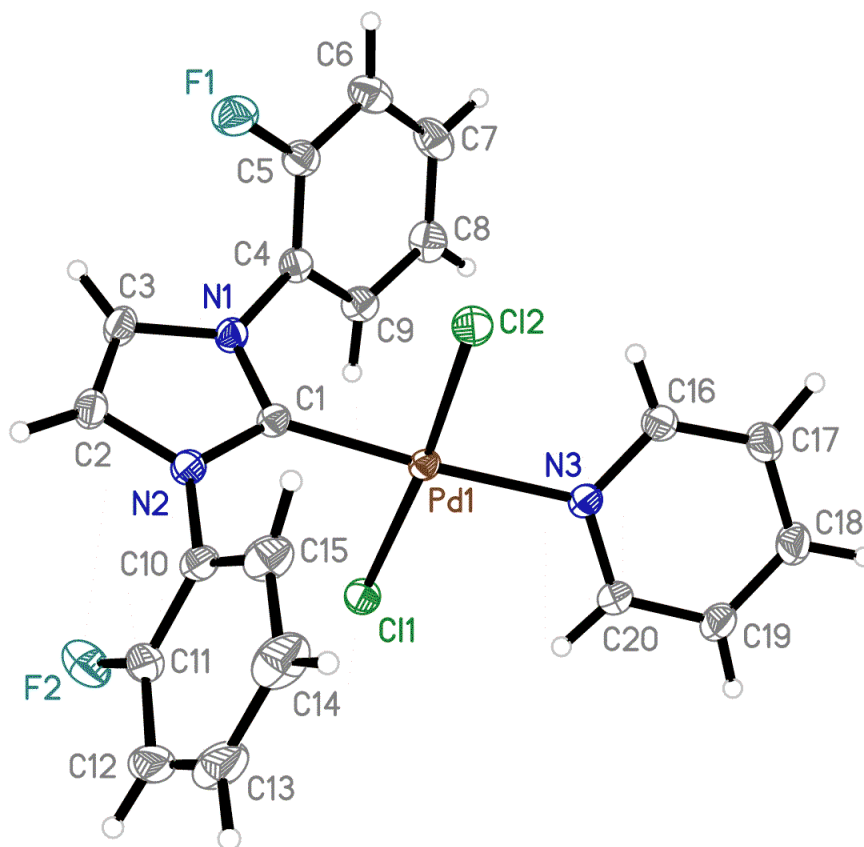

**Figure S39.** Crystal structure of **4a1**. Thermal ellipsoids are set to a 50% probability level.

**Table S5.** Selected bond distances for **4a1** (Å).

| Atoms       | Distance   | Atoms      | Distance   | Atoms       | Distance   |
|-------------|------------|------------|------------|-------------|------------|
| Pd(1)-Cl(1) | 2.3155(3)  | N(2)-C(10) | 1.4314(15) | C(10)-C(11) | 1.3789(19) |
| Pd(1)-Cl(2) | 2.3061(3)  | N(3)-C(16) | 1.3471(17) | C(10)-C(15) | 1.392(2)   |
| Pd(1)-N(3)  | 2.1031(10) | N(3)-C(20) | 1.3428(16) | C(11)-C(12) | 1.388(2)   |
| Pd(1)-C(1)  | 1.9481(11) | C(2)-H(2)  | 0.964(19)  | C(12)-C(13) | 1.381(3)   |
| F(1)-C(5)   | 1.3515(16) | C(2)-C(3)  | 1.3463(18) | C(13)-C(14) | 1.384(3)   |
| F(2)-C(11)  | 1.3355(19) | C(4)-C(5)  | 1.3829(18) | C(14)-C(15) | 1.397(2)   |
| N(1)-C(1)   | 1.3506(15) | C(4)-C(9)  | 1.3946(18) | C(16)-C(17) | 1.3838(19) |
| N(1)-C(3)   | 1.3977(16) | C(5)-C(6)  | 1.383(2)   | C(17)-C(18) | 1.385(2)   |
| N(1)-C(4)   | 1.4291(15) | C(6)-C(7)  | 1.389(2)   | C(18)-C(19) | 1.383(2)   |
| N(2)-C(1)   | 1.3494(15) | C(7)-C(8)  | 1.390(2)   | C(19)-C(20) | 1.3891(18) |
| N(2)-C(2)   | 1.3958(16) | C(8)-C(9)  | 1.3919(19) |             |            |

**Table S6.** Selected bond angles for **4a1** (°).

| Atoms             | Angle       | Atoms             | Angle      |
|-------------------|-------------|-------------------|------------|
| Cl(2)-Pd(1)-Cl(1) | 173.202(12) | F(1)-C(5)-C(4)    | 118.55(11) |
| N(3)-Pd(1)-Cl(1)  | 93.45(3)    | F(1)-C(5)-C(6)    | 119.51(12) |
| N(3)-Pd(1)-Cl(2)  | 92.47(3)    | C(6)-C(5)-C(4)    | 121.91(13) |
| C(1)-Pd(1)-Cl(1)  | 87.13(4)    | C(5)-C(6)-C(7)    | 118.61(14) |
| C(1)-Pd(1)-Cl(2)  | 87.29(4)    | C(6)-C(7)-C(8)    | 120.60(13) |
| C(1)-Pd(1)-N(3)   | 174.62(4)   | C(7)-C(8)-C(9)    | 119.96(13) |
| C(1)-N(1)-C(3)    | 110.51(10)  | C(8)-C(9)-C(4)    | 119.78(12) |
| C(1)-N(1)-C(4)    | 121.88(10)  | C(11)-C(10)-N(2)  | 120.13(12) |
| C(3)-N(1)-C(4)    | 127.41(10)  | C(11)-C(10)-C(15) | 119.58(12) |
| C(1)-N(2)-C(2)    | 110.60(10)  | C(15)-C(10)-N(2)  | 120.29(12) |
| C(1)-N(2)-C(10)   | 123.31(10)  | F(2)-C(11)-C(10)  | 118.90(12) |
| C(2)-N(2)-C(10)   | 125.96(10)  | F(2)-C(11)-C(12)  | 119.67(15) |
| C(16)-N(3)-Pd(1)  | 119.74(8)   | C(10)-C(11)-C(12) | 121.43(16) |
| C(20)-N(3)-Pd(1)  | 122.01(9)   | C(13)-C(12)-C(11) | 118.78(16) |
| C(20)-N(3)-C(16)  | 118.25(11)  | C(12)-C(13)-C(14) | 120.83(14) |
| N(1)-C(1)-Pd(1)   | 124.27(9)   | C(13)-C(14)-C(15) | 119.98(18) |
| N(2)-C(1)-Pd(1)   | 130.22(9)   | C(10)-C(15)-C(14) | 119.41(16) |
| N(2)-C(1)-N(1)    | 105.48(10)  | N(3)-C(16)-C(17)  | 122.12(12) |
| C(3)-C(2)-N(2)    | 106.73(11)  | C(16)-C(17)-C(18) | 119.36(13) |
| C(2)-C(3)-N(1)    | 106.66(11)  | C(19)-C(18)-C(17) | 118.84(12) |
| C(5)-C(4)-N(1)    | 120.24(11)  | C(18)-C(19)-C(20) | 118.71(12) |
| C(5)-C(4)-C(9)    | 119.08(11)  | N(3)-C(20)-C(19)  | 122.68(12) |
| C(9)-C(4)-N(1)    | 120.34(11)  |                   |            |

**Table S7.** Torsion angles for **4a1** (°).

| Atoms                  | Angle       | Atoms                   | Angle       |
|------------------------|-------------|-------------------------|-------------|
| Pd(1)-N(3)-C(16)-C(17) | -179.60(11) | C(4)-N(1)-C(1)-Pd(1)    | -7.01(16)   |
| Pd(1)-N(3)-C(20)-C(19) | -178.90(10) | C(4)-N(1)-C(1)-N(2)     | 174.84(11)  |
| F(1)-C(5)-C(6)-C(7)    | 177.41(13)  | C(4)-N(1)-C(3)-C(2)     | -174.80(12) |
| F(2)-C(11)-C(12)-C(13) | 178.74(13)  | C(4)-C(5)-C(6)-C(7)     | -0.7(2)     |
| N(1)-C(4)-C(5)-F(1)    | -6.31(18)   | C(5)-C(4)-C(9)-C(8)     | 2.71(19)    |
| N(1)-C(4)-C(5)-C(6)    | 171.82(12)  | C(5)-C(6)-C(7)-C(8)     | 1.7(2)      |
| N(1)-C(4)-C(9)-C(8)    | -170.59(12) | C(6)-C(7)-C(8)-C(9)     | -0.4(2)     |
| N(2)-C(2)-C(3)-N(1)    | 0.22(15)    | C(7)-C(8)-C(9)-C(4)     | -1.8(2)     |
| N(2)-C(10)-C(11)-F(2)  | 1.05(18)    | C(9)-C(4)-C(5)-F(1)     | -179.61(11) |
| N(2)-C(10)-C(11)-C(12) | -179.24(12) | C(9)-C(4)-C(5)-C(6)     | -1.5(2)     |
| N(2)-C(10)-C(15)-C(14) | -179.90(13) | C(10)-N(2)-C(1)-Pd(1)   | 6.47(18)    |
| N(3)-C(16)-C(17)-C(18) | -1.1(2)     | C(10)-N(2)-C(1)-N(1)    | -175.53(11) |
| C(1)-N(1)-C(3)-C(2)    | 0.11(15)    | C(10)-N(2)-C(2)-C(3)    | 175.46(12)  |
| C(1)-N(1)-C(4)-C(5)    | -118.30(14) | C(10)-C(11)-C(12)-C(13) | -1.0(2)     |
| C(1)-N(1)-C(4)-C(9)    | 54.92(17)   | C(11)-C(10)-C(15)-C(14) | 0.2(2)      |
| C(1)-N(2)-C(2)-C(3)    | -0.49(16)   | C(11)-C(12)-C(13)-C(14) | 0.4(2)      |
| C(1)-N(2)-C(10)-C(11)  | -119.02(14) | C(12)-C(13)-C(14)-C(15) | 0.4(2)      |
| C(1)-N(2)-C(10)-C(15)  | 61.07(17)   | C(13)-C(14)-C(15)-C(10) | -0.7(2)     |
| C(2)-N(2)-C(1)-Pd(1)   | -177.46(10) | C(15)-C(10)-C(11)-F(2)  | -179.04(12) |
| C(2)-N(2)-C(1)-N(1)    | 0.54(14)    | C(15)-C(10)-C(11)-C(12) | 0.7(2)      |
| C(2)-N(2)-C(10)-C(11)  | 65.53(17)   | C(16)-N(3)-C(20)-C(19)  | 2.07(19)    |
| C(2)-N(2)-C(10)-C(15)  | -114.38(15) | C(16)-C(17)-C(18)-C(19) | 1.3(2)      |
| C(3)-N(1)-C(1)-Pd(1)   | 177.75(9)   | C(17)-C(18)-C(19)-C(20) | 0.2(2)      |
| C(3)-N(1)-C(1)-N(2)    | -0.40(14)   | C(18)-C(19)-C(20)-N(3)  | -1.9(2)     |
| C(3)-N(1)-C(4)-C(5)    | 56.08(18)   | C(20)-N(3)-C(16)-C(17)  | -0.6(2)     |
| C(3)-N(1)-C(4)-C(9)    | -130.70(14) |                         |             |

### The structure of polymorph **4a2**.

The asymmetric unit of monoclinic polymorph modification **4a2** contains two crystallographically inequivalent molecules of complex **4a**.

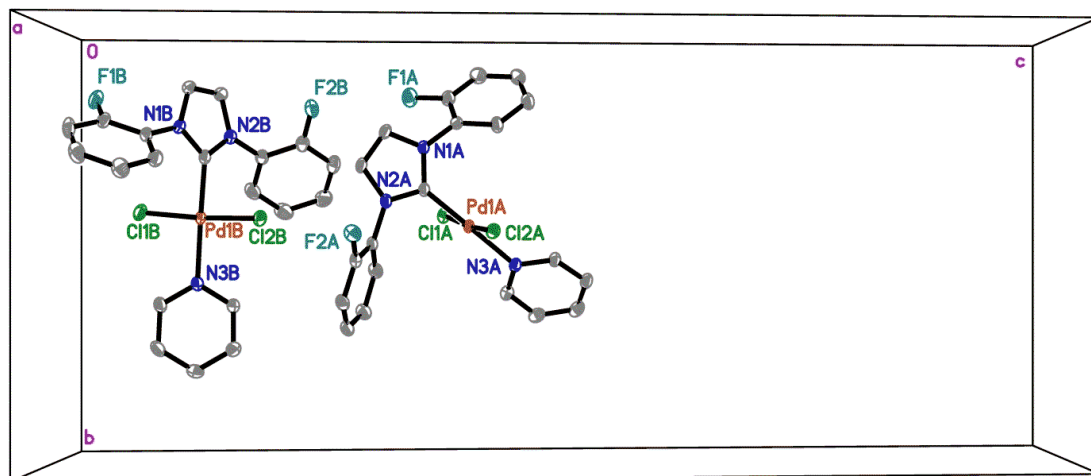

**Figure S40.** Unit cell and two inequivalent molecules of complex **4a** in polymorph modification **4a2**.

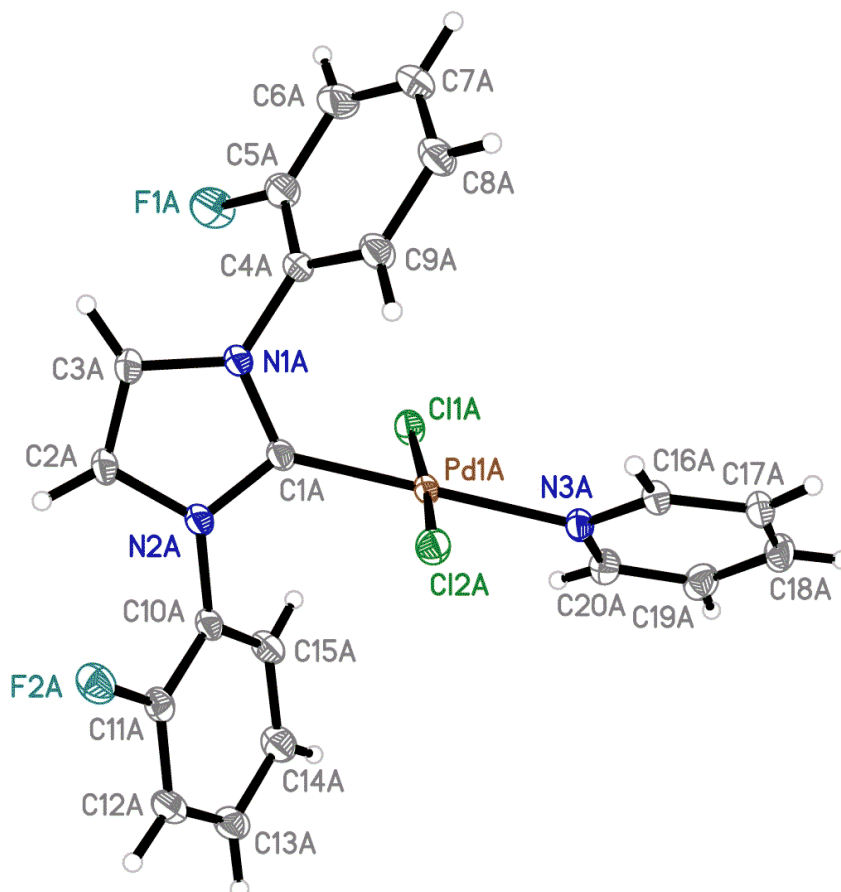

**Figure S41.** The structure of the first molecule of **4a** in **4a2**. Thermal ellipsoids are set to a 50% probability level.

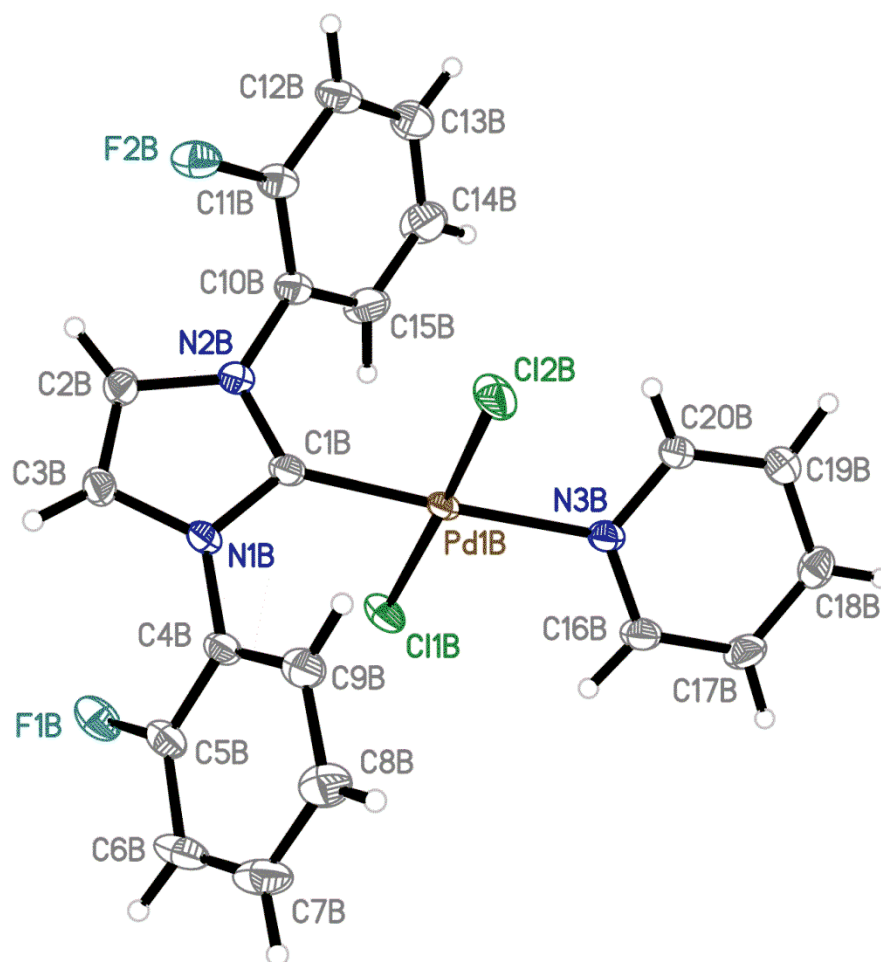

**Figure S42.** The structure of the second molecule of **4a** in **4a2**. Thermal ellipsoids are set to a 50% probability level.

**Table S8.** Selected bond distances for **4a2** (Å).

| Atoms         | Distance   | Atoms         | Distance   | Atoms         | Distance |
|---------------|------------|---------------|------------|---------------|----------|
| Pd(1A)-Cl(1A) | 2.3140(4)  | C(11A)-C(12A) | 1.382(2)   | N(2B)-C(10B)  | 1.429(2) |
| Pd(1A)-Cl(2A) | 2.3079(4)  | C(12A)-C(13A) | 1.382(2)   | C(2B)-C(3B)   | 1.343(2) |
| Pd(1A)-C(1A)  | 1.9507(14) | C(13A)-C(14A) | 1.387(2)   | C(4B)-C(5B)   | 1.380(2) |
| Pd(1A)-N(3A)  | 2.0927(12) | C(14A)-C(15A) | 1.385(2)   | C(4B)-C(9B)   | 1.389(2) |
| F(1A)-C(5A)   | 1.3546(19) | N(3A)-C(16A)  | 1.343(2)   | C(5B)-C(6B)   | 1.378(2) |
| F(2A)-C(11A)  | 1.3529(18) | N(3A)-C(20A)  | 1.343(2)   | C(6B)-C(7B)   | 1.383(3) |
| N(1A)-C(1A)   | 1.3517(19) | C(16A)-C(17A) | 1.389(2)   | C(7B)-C(8B)   | 1.387(3) |
| N(1A)-C(3A)   | 1.3933(19) | C(17A)-C(18A) | 1.386(3)   | C(8B)-C(9B)   | 1.393(3) |
| N(1A)-C(4A)   | 1.4305(18) | C(18A)-C(19A) | 1.383(3)   | C(10B)-C(11B) | 1.387(2) |
| C(1A)-N(2A)   | 1.3547(18) | C(19A)-C(20A) | 1.386(2)   | C(10B)-C(15B) | 1.389(2) |
| N(2A)-C(2A)   | 1.3962(19) | Pd(1B)-Cl(1B) | 2.3116(4)  | C(11B)-C(12B) | 1.384(2) |
| N(2A)-C(10A)  | 1.4305(19) | Pd(1B)-Cl(2B) | 2.3018(4)  | C(12B)-C(13B) | 1.383(3) |
| C(2A)-C(3A)   | 1.344(2)   | Pd(1B)-C(1B)  | 1.9497(15) | C(13B)-C(14B) | 1.384(3) |

|               |          |              |            |               |          |
|---------------|----------|--------------|------------|---------------|----------|
| C(4A)-C(5A)   | 1.381(2) | Pd(1B)-N(3B) | 2.0846(13) | C(14B)-C(15B) | 1.393(3) |
| C(4A)-C(9A)   | 1.388(2) | F(1B)-C(5B)  | 1.350(2)   | N(3B)-C(16B)  | 1.341(2) |
| C(5A)-C(6A)   | 1.379(2) | F(2B)-C(11B) | 1.3540(19) | N(3B)-C(20B)  | 1.349(2) |
| C(6A)-C(7A)   | 1.385(3) | N(1B)-C(1B)  | 1.3482(19) | C(16B)-C(17B) | 1.385(2) |
| C(7A)-C(8A)   | 1.385(3) | N(1B)-C(3B)  | 1.397(2)   | C(17B)-C(18B) | 1.382(2) |
| C(8A)-C(9A)   | 1.391(2) | N(1B)-C(4B)  | 1.425(2)   | C(18B)-C(19B) | 1.388(2) |
| C(10A)-C(11A) | 1.380(2) | C(1B)-N(2B)  | 1.358(2)   | C(19B)-C(20B) | 1.385(2) |
| C(10A)-C(15A) | 1.387(2) | N(2B)-C(2B)  | 1.402(2)   |               |          |

**Table S9.** Selected bond angles for **4a2** (°).

| Atoms                | Angle       | Atoms                | Angle      |
|----------------------|-------------|----------------------|------------|
| Cl(2A)-Pd(1A)-Cl(1A) | 174.449(14) | C(15A)-C(10A)-N(2A)  | 120.63(13) |
| C(1A)-Pd(1A)-Cl(1A)  | 87.15(4)    | F(2A)-C(11A)-C(10A)  | 118.78(13) |
| C(1A)-Pd(1A)-Cl(2A)  | 88.12(4)    | N(3B)-Pd(1B)-Cl(1B)  | 92.77(4)   |
| C(1A)-Pd(1A)-N(3A)   | 179.29(6)   | N(3B)-Pd(1B)-Cl(2B)  | 91.11(4)   |
| N(3A)-Pd(1A)-Cl(1A)  | 92.21(4)    | C(1B)-N(1B)-C(3B)    | 110.75(13) |
| N(3A)-Pd(1A)-Cl(2A)  | 92.53(4)    | C(1B)-N(1B)-C(4B)    | 123.27(13) |
| C(1A)-N(1A)-C(3A)    | 110.87(12)  | C(3B)-N(1B)-C(4B)    | 125.98(13) |
| C(1A)-N(1A)-C(4A)    | 123.58(12)  | N(1B)-C(1B)-Pd(1B)   | 127.68(11) |
| C(3A)-N(1A)-C(4A)    | 125.45(12)  | N(1B)-C(1B)-N(2B)    | 105.28(13) |
| N(1A)-C(1A)-Pd(1A)   | 127.65(10)  | N(2B)-C(1B)-Pd(1B)   | 126.56(11) |
| N(1A)-C(1A)-N(2A)    | 104.90(12)  | C(1B)-N(2B)-C(2B)    | 110.38(13) |
| N(2A)-C(1A)-Pd(1A)   | 127.44(11)  | C(1B)-N(2B)-C(10B)   | 123.36(13) |
| C(1A)-N(2A)-C(2A)    | 110.80(12)  | C(2B)-N(2B)-C(10B)   | 126.25(13) |
| C(1A)-N(2A)-C(10A)   | 123.66(12)  | C(3B)-C(2B)-N(2B)    | 106.63(14) |
| C(2A)-N(2A)-C(10A)   | 125.45(12)  | C(2B)-C(3B)-N(1B)    | 106.94(13) |
| C(3A)-C(2A)-N(2A)    | 106.58(13)  | C(5B)-C(4B)-N(1B)    | 119.83(15) |
| C(2A)-C(3A)-N(1A)    | 106.85(13)  | F(2B)-C(11B)-C(12B)  | 119.10(15) |
| C(5A)-C(4A)-N(1A)    | 119.51(13)  | C(12B)-C(11B)-C(10B) | 122.37(16) |
| C(5A)-C(4A)-C(9A)    | 119.03(14)  | C(13B)-C(12B)-C(11B) | 118.24(17) |
| C(9A)-C(4A)-N(1A)    | 121.43(13)  | C(12B)-C(13B)-C(14B) | 120.56(17) |
| F(1A)-C(5A)-C(4A)    | 118.59(14)  | C(13B)-C(14B)-C(15B) | 120.47(18) |
| F(1A)-C(5A)-C(6A)    | 119.47(15)  | C(10B)-C(15B)-C(14B) | 119.69(17) |
| C(6A)-C(5A)-C(4A)    | 121.94(15)  | C(16B)-N(3B)-Pd(1B)  | 122.53(11) |
| C(5A)-C(6A)-C(7A)    | 118.60(16)  | C(16B)-N(3B)-C(20B)  | 118.24(14) |
| C(8A)-C(7A)-C(6A)    | 120.65(16)  | C(20B)-N(3B)-Pd(1B)  | 119.18(10) |
| C(7A)-C(8A)-C(9A)    | 119.89(16)  | N(3B)-C(16B)-C(17B)  | 122.38(15) |
| C(4A)-C(9A)-C(8A)    | 119.89(15)  | C(18B)-C(17B)-C(16B) | 119.34(15) |
| C(11A)-C(10A)-N(2A)  | 120.63(14)  | C(17B)-C(18B)-C(19B) | 118.69(15) |

|                      |             |                      |            |
|----------------------|-------------|----------------------|------------|
| C(11A)-C(10A)-C(15A) | 118.74(14)  | C(20B)-C(19B)-C(18B) | 118.91(15) |
| F(2A)-C(11A)-C(12A)  | 119.25(14)  | N(3B)-C(20B)-C(19B)  | 122.44(15) |
| C(10A)-C(11A)-C(12A) | 121.97(15)  | C(5B)-C(4B)-C(9B)    | 119.43(15) |
| C(13A)-C(12A)-C(11A) | 118.71(15)  | C(9B)-C(4B)-N(1B)    | 120.70(14) |
| C(12A)-C(13A)-C(14A) | 120.30(15)  | F(1B)-C(5B)-C(4B)    | 118.88(15) |
| C(15A)-C(14A)-C(13A) | 120.14(16)  | F(1B)-C(5B)-C(6B)    | 119.04(15) |
| C(14A)-C(15A)-C(10A) | 120.12(15)  | C(6B)-C(5B)-C(4B)    | 122.07(17) |
| C(16A)-N(3A)-Pd(1A)  | 120.46(10)  | C(5B)-C(6B)-C(7B)    | 118.36(17) |
| C(16A)-N(3A)-C(20A)  | 118.08(13)  | C(6B)-C(7B)-C(8B)    | 120.69(17) |
| C(20A)-N(3A)-Pd(1A)  | 121.26(11)  | C(7B)-C(8B)-C(9B)    | 120.22(19) |
| N(3A)-C(16A)-C(17A)  | 122.55(16)  | C(4B)-C(9B)-C(8B)    | 119.19(16) |
| C(18A)-C(17A)-C(16A) | 118.81(16)  | C(11B)-C(10B)-N(2B)  | 120.52(14) |
| C(19A)-C(18A)-C(17A) | 118.92(15)  | C(11B)-C(10B)-C(15B) | 118.56(15) |
| C(18A)-C(19A)-C(20A) | 118.87(16)  | C(15B)-C(10B)-N(2B)  | 120.86(15) |
| N(3A)-C(20A)-C(19A)  | 122.70(15)  | F(2B)-C(11B)-C(10B)  | 118.52(14) |
| Cl(2B)-Pd(1B)-Cl(1B) | 174.388(16) | C(1B)-Pd(1B)-Cl(2B)  | 90.41(5)   |
| C(1B)-Pd(1B)-Cl(1B)  | 86.01(5)    | C(1B)-Pd(1B)-N(3B)   | 175.64(6)  |

**Table S10.** Torsion angles for **4a2** (°).

| Atoms                      | Angle       | Atoms                       | Angle       |
|----------------------------|-------------|-----------------------------|-------------|
| Pd(1A)-C(1A)-N(2A)-C(2A)   | -179.35(11) | C(3A)-N(1A)-C(4A)-C(9A)     | 123.96(17)  |
| Pd(1A)-C(1A)-N(2A)-C(10A)  | -2.7(2)     | C(4A)-N(1A)-C(1A)-Pd(1A)    | 2.8(2)      |
| Pd(1A)-N(3A)-C(16A)-C(17A) | -172.55(12) | C(4A)-N(1A)-C(1A)-N(2A)     | -176.58(13) |
| Pd(1A)-N(3A)-C(20A)-C(19A) | 174.06(12)  | C(4A)-N(1A)-C(3A)-C(2A)     | 176.43(14)  |
| F(1A)-C(5A)-C(6A)-C(7A)    | -179.42(17) | C(4A)-C(5A)-C(6A)-C(7A)     | -0.2(3)     |
| F(2A)-C(11A)-C(12A)-C(13A) | -178.11(14) | C(5A)-C(4A)-C(9A)-C(8A)     | 0.8(3)      |
| N(1A)-C(1A)-N(2A)-C(2A)    | 0.02(17)    | C(5A)-C(6A)-C(7A)-C(8A)     | 0.4(3)      |
| N(1A)-C(1A)-N(2A)-C(10A)   | 176.69(13)  | C(6A)-C(7A)-C(8A)-C(9A)     | 0.0(3)      |
| N(1A)-C(4A)-C(5A)-F(1A)    | 0.6(2)      | C(7A)-C(8A)-C(9A)-C(4A)     | -0.6(3)     |
| N(1A)-C(4A)-C(5A)-C(6A)    | -178.62(16) | C(9A)-C(4A)-C(5A)-F(1A)     | 178.81(15)  |
| N(1A)-C(4A)-C(9A)-C(8A)    | 178.97(16)  | C(9A)-C(4A)-C(5A)-C(6A)     | -0.4(3)     |
| C(1A)-N(1A)-C(3A)-C(2A)    | -0.13(18)   | C(10A)-N(2A)-C(2A)-C(3A)    | -176.70(14) |
| C(1A)-N(1A)-C(4A)-C(5A)    | 118.24(17)  | C(10A)-C(11A)-C(12A)-C(13A) | 1.3(2)      |
| C(1A)-N(1A)-C(4A)-C(9A)    | -59.9(2)    | C(11A)-C(10A)-C(15A)-C(14A) | -1.5(2)     |
| C(1A)-N(2A)-C(2A)-C(3A)    | -0.10(18)   | C(11A)-C(12A)-C(13A)-C(14A) | -1.5(2)     |
| C(1A)-N(2A)-C(10A)-C(11A)  | 128.78(16)  | C(12A)-C(13A)-C(14A)-C(15A) | 0.3(3)      |
| C(1A)-N(2A)-C(10A)-C(15A)  | -50.5(2)    | C(13A)-C(14A)-C(15A)-C(10A) | 1.2(3)      |
| N(2A)-C(2A)-C(3A)-N(1A)    | 0.14(18)    | C(15A)-C(10A)-C(11A)-F(2A)  | 179.62(14)  |
| N(2A)-C(10A)-C(11A)-F(2A)  | 0.3(2)      | C(15A)-C(10A)-C(11A)-C(12A) | 0.2(2)      |

|                            |             |                             |             |
|----------------------------|-------------|-----------------------------|-------------|
| N(2A)-C(10A)-C(11A)-C(12A) | -179.12(14) | N(3A)-C(16A)-C(17A)-C(18A)  | -1.7(2)     |
| N(2A)-C(10A)-C(15A)-C(14A) | 177.87(15)  | C(16A)-N(3A)-C(20A)-C(19A)  | -0.9(2)     |
| C(2A)-N(2A)-C(10A)-C(11A)  | -55.0(2)    | C(16A)-C(17A)-C(18A)-C(19A) | -0.6(2)     |
| C(2A)-N(2A)-C(10A)-C(15A)  | 125.63(17)  | C(17A)-C(18A)-C(19A)-C(20A) | 2.0(2)      |
| C(3A)-N(1A)-C(1A)-Pd(1A)   | 179.43(11)  | C(18A)-C(19A)-C(20A)-N(3A)  | -1.3(3)     |
| C(3A)-N(1A)-C(1A)-N(2A)    | 0.06(17)    | C(20A)-N(3A)-C(16A)-C(17A)  | 2.5(2)      |
| C(3A)-N(1A)-C(4A)-C(5A)    | -57.9(2)    | Pd(1B)-C(1B)-N(2B)-C(2B)    | 171.95(11)  |
| Pd(1B)-C(1B)-N(2B)-C(10B)  | -9.2(2)     | C(1B)-N(1B)-C(4B)-C(9B)     | 50.2(2)     |
| Pd(1B)-N(3B)-C(16B)-C(17B) | 178.17(14)  | C(1B)-N(2B)-C(2B)-C(3B)     | 0.11(18)    |
| Pd(1B)-N(3B)-C(20B)-C(19B) | -177.41(13) | C(1B)-N(2B)-C(10B)-C(11B)   | -124.61(17) |
| F(1B)-C(5B)-C(6B)-C(7B)    | 176.04(15)  | C(1B)-N(2B)-C(10B)-C(15B)   | 52.6(2)     |
| F(2B)-C(11B)-C(12B)-C(13B) | -177.70(17) | N(2B)-C(2B)-C(3B)-N(1B)     | 0.44(17)    |
| N(1B)-C(1B)-N(2B)-C(2B)    | -0.63(17)   | N(2B)-C(10B)-C(11B)-F(2B)   | -6.5(2)     |
| N(1B)-C(1B)-N(2B)-C(10B)   | 178.20(14)  | N(2B)-C(10B)-C(11B)-C(12B)  | 173.42(16)  |
| N(1B)-C(4B)-C(5B)-F(1B)    | 0.5(2)      | N(2B)-C(10B)-C(15B)-C(14B)  | -174.79(18) |
| N(1B)-C(4B)-C(5B)-C(6B)    | 179.04(15)  | C(2B)-N(2B)-C(10B)-C(11B)   | 54.0(2)     |
| N(1B)-C(4B)-C(9B)-C(8B)    | -177.21(15) | C(2B)-N(2B)-C(10B)-C(15B)   | -128.72(19) |
| C(1B)-N(1B)-C(3B)-C(2B)    | -0.87(18)   | C(3B)-N(1B)-C(1B)-Pd(1B)    | -171.55(12) |
| C(1B)-N(1B)-C(4B)-C(5B)    | -127.64(16) | C(3B)-N(1B)-C(1B)-N(2B)     | 0.92(17)    |
| C(3B)-N(1B)-C(4B)-C(5B)    | 51.7(2)     | C(10B)-N(2B)-C(2B)-C(3B)    | -178.68(15) |
| C(3B)-N(1B)-C(4B)-C(9B)    | -130.37(17) | C(10B)-C(11B)-C(12B)-C(13B) | 2.4(3)      |
| C(4B)-N(1B)-C(1B)-Pd(1B)   | 7.9(2)      | C(11B)-C(10B)-C(15B)-C(14B) | 2.5(3)      |
| C(4B)-N(1B)-C(1B)-N(2B)    | -179.62(14) | C(11B)-C(12B)-C(13B)-C(14B) | 0.5(3)      |
| C(4B)-N(1B)-C(3B)-C(2B)    | 179.68(14)  | C(12B)-C(13B)-C(14B)-C(15B) | -1.8(4)     |
| C(4B)-C(5B)-C(6B)-C(7B)    | -2.5(3)     | C(13B)-C(14B)-C(15B)-C(10B) | 0.2(3)      |
| C(5B)-C(4B)-C(9B)-C(8B)    | 0.7(2)      | C(15B)-C(10B)-C(11B)-F(2B)  | 176.20(16)  |
| C(5B)-C(6B)-C(7B)-C(8B)    | 2.1(3)      | C(15B)-C(10B)-C(11B)-C(12B) | -3.9(3)     |
| C(6B)-C(7B)-C(8B)-C(9B)    | -0.3(3)     | N(3B)-C(16B)-C(17B)-C(18B)  | -1.0(3)     |
| C(7B)-C(8B)-C(9B)-C(4B)    | -1.1(3)     | C(16B)-N(3B)-C(20B)-C(19B)  | -0.1(3)     |
| C(9B)-C(4B)-C(5B)-F(1B)    | -177.42(14) | C(16B)-C(17B)-C(18B)-C(19B) | 0.2(3)      |
| C(9B)-C(4B)-C(5B)-C(6B)    | 1.1(2)      | C(17B)-C(18B)-C(19B)-C(20B) | 0.6(3)      |
| C(18B)-C(19B)-C(20B)-N(3B) | -0.7(3)     | C(20B)-N(3B)-C(16B)-C(17B)  | 0.9(3)      |



### The structure of 4b

Better refinement results for **4b** were obtained in the  $C2/m$  space group rather than in  $C2$ . Other space groups were also tested.

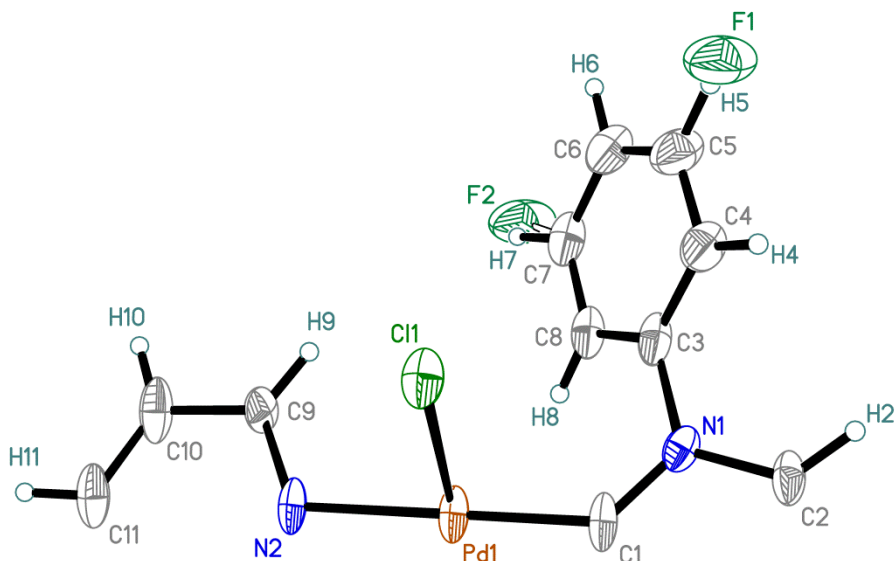

**Figure S43.** Crystallographically inequivalent fragment of the molecule **4b**. Thermal ellipsoids are set to a 50% probability level.

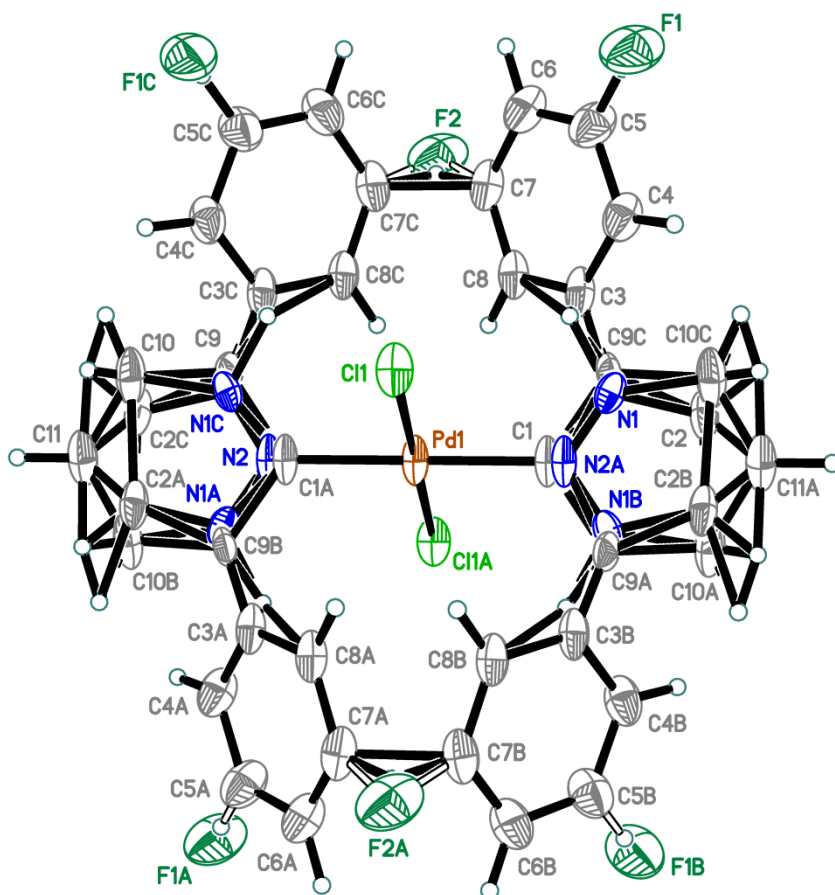

**Figure S44.** The real structure of **4b**, which is superposition of two equivalent molecules **4b**. Thermal ellipsoids are set to a 50% probability level.

Atom Pd1 is located at an inversion center; atoms Pd1, C11, C1, N2 and C11 are situated on a mirror plane. The occupancy of atoms Pd1, C1, N2 and C11 situated on a mirror plane is 0.25, other atoms (except for disordered H7/F2 and H5/F1 fragments) have occupancy of 0.5. Therefore, half the molecule **4b** is crystallographically unique (Fig. S43) and  $Z' = \frac{1}{4}$ .

The overall structure with symmetry generated atoms is shown in Fig. S44, which is the result of a superposition of two equivalent molecules (shown in Fig. S45) both having occupancies of 0.5. Additionally, the fluorine atom is disordered over two positions (Fig. S45). The structure of the complex with omitted disorder is shown in Fig. S46.

A relatively poor precision in determining bond lengths is likely because the asymmetric unit is fully disordered over four positions. Unfortunately, further modeling, where atoms N2, C1, and C11 were slightly out of the crystallographic mirror plane, did not provide a better crystallographic model for **4b**.

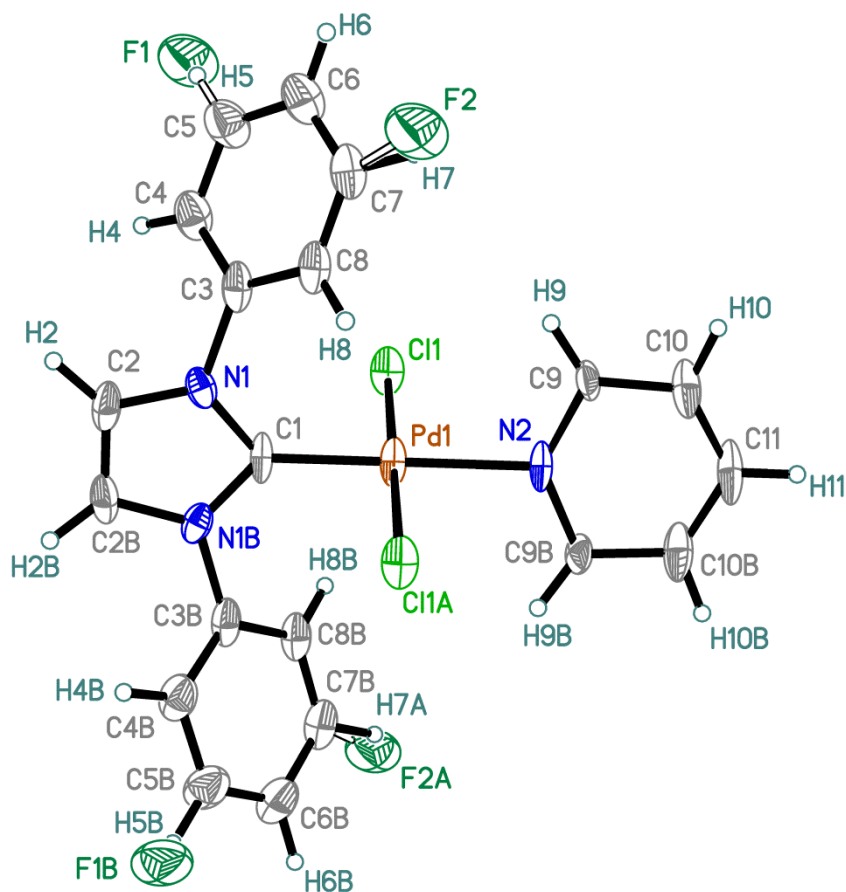

**Figure S45.** The structure of complex **4b** (occupancy is 0.5). The thermal ellipsoids are set to a 50% probability level. The disorder ratio for atoms H7/F2 and F1/H5 is 0.896(5):0.104(5).

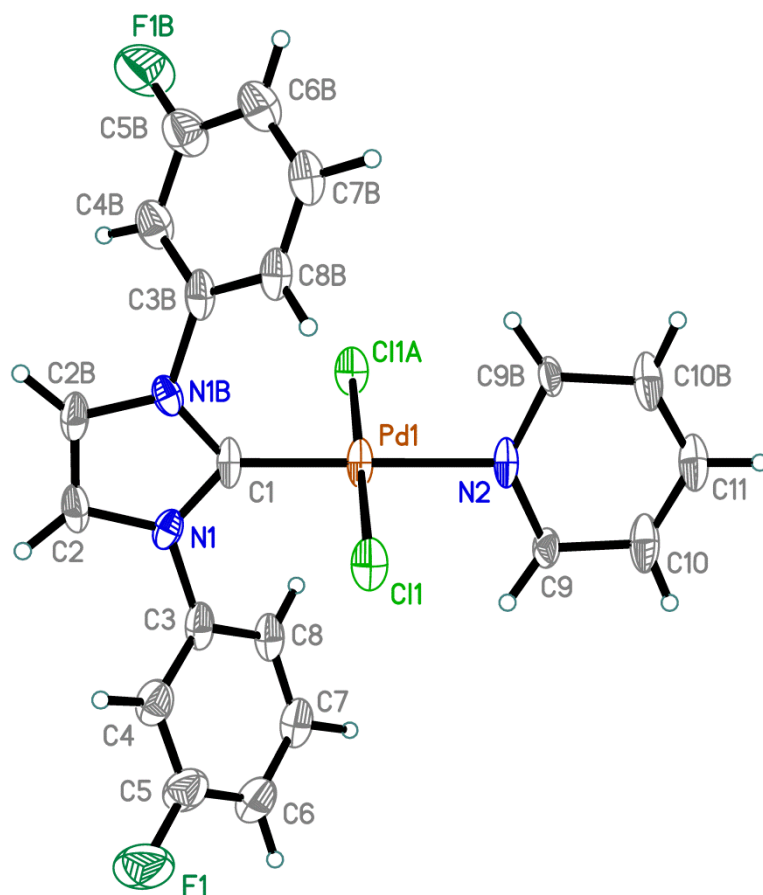

**Figure S46.** The structure of complex **4b**. The thermal ellipsoids are set to a 50% probability level. The fluorine disorder is not shown for clarity.

**Table S11.** Selected bond distances for **4b** (Å).

| Atoms       | Distance  | Atoms     | Distance  | Atoms       | Distance  |
|-------------|-----------|-----------|-----------|-------------|-----------|
| Pd(1)-Cl(1) | 2.3176(6) | C(3)-C(8) | 1.389(5)  | C(7)-F(2)   | 1.320(6)  |
| Pd(1)-C(1)  | 1.88(3)   | C(4)-H(4) | 0.976(10) | C(7)-C(8)   | 1.390(6)  |
| Pd(1)-N(2)  | 2.12(2)   | C(4)-C(5) | 1.387(6)  | C(8)-H(8)   | 0.975(10) |
| C(1)-N(1)   | 1.31(2)   | C(5)-H(5) | 0.980(10) | N(2)-C(9)   | 1.404(17) |
| N(1)-C(2)   | 1.353(12) | C(5)-F(1) | 1.325(6)  | C(9)-H(9)   | 0.978(10) |
| N(1)-C(3)   | 1.530(11) | C(5)-C(6) | 1.374(6)  | C(9)-C(10)  | 1.443(13) |
| C(2)-C(2)#1 | 1.343(12) | C(6)-H(6) | 0.973(10) | C(10)-H(10) | 0.980(10) |
| C(2)-H(2)   | 0.974(10) | C(6)-C(7) | 1.384(6)  | C(10)-C(11) | 1.377(7)  |
| C(3)-C(4)   | 1.389(6)  | C(7)-H(7) | 1.105(9)  | C(11)-H(11) | 0.981(10) |

Symmetry transformation to generate equivalent atoms: #1 -x+1, y, -z+1

**Table S12.** Selected bond angles for **4b** (°).

| Atoms               | Angle     | Atoms               | Angle     |
|---------------------|-----------|---------------------|-----------|
| Cl(1)#2-Pd(1)-Cl(1) | 180.00(3) | F(1)-C(5)-C(4)      | 117.0(4)  |
| C(1)-Pd(1)-Cl(1)    | 90.000(1) | F(1)-C(5)-C(6)      | 120.2(4)  |
| C(1)-Pd(1)-N(2)     | 180.0     | C(6)-C(5)-C(4)      | 122.7(4)  |
| N(2)-Pd(1)-Cl(1)    | 90.000(2) | C(5)-C(6)-C(7)      | 118.4(4)  |
| N(1)-C(1)-Pd(1)     | 132.0(10) | C(6)-C(7)-C(8)      | 121.1(3)  |
| C(1)-N(1)-C(2)      | 119.0(12) | F(2)-C(7)-C(6)      | 109.5(8)  |
| C(1)-N(1)-C(3)      | 120.5(11) | F(2)-C(7)-C(8)      | 128.7(9)  |
| C(2)-N(1)-C(3)      | 120.3(8)  | C(3)-C(8)-C(7)      | 118.8(3)  |
| C(2)#1-C(2)-N(1)    | 102.9(5)  | C(9)-N(2)-Pd(1)     | 116.0(9)  |
| C(4)-C(3)-N(1)      | 117.1(5)  | C(9)#1-N(2)-C(9)    | 128.0(19) |
| C(8)-C(3)-N(1)      | 121.5(5)  | N(2)-C(9)-C(10)     | 113.0(12) |
| C(8)-C(3)-C(4)      | 121.3(4)  | C(11)-C(10)-C(9)    | 123.3(7)  |
| C(5)-C(4)-C(3)      | 117.6(4)  | C(10)-C(11)-C(10)#1 | 119.2(6)  |

Symmetry transformations to generate equivalent atoms: #1 -x+1, y, -z+1; #2 -x+1, -y+1, -z+1

**Table S13.** Torsion angles for **4b** (°).

| Atoms                   | Angle     | Atoms                    | Angle     |
|-------------------------|-----------|--------------------------|-----------|
| Pd(1)-C(1)-N(1)-C(2)    | -178.5(4) | C(3)-N(1)-C(2)-C(2)#1    | -179.0(7) |
| Pd(1)-C(1)-N(1)-C(3)    | -3.2(10)  | C(3)-C(4)-C(5)-F(1)      | 177.3(5)  |
| Pd(1)-N(2)-C(9)-C(10)   | -177.7(6) | C(3)-C(4)-C(5)-C(6)      | 0.0(7)    |
| Cl(1)-Pd(1)-C(1)-N(1)   | -63.9(6)  | C(4)-C(3)-C(8)-C(7)      | -1.4(5)   |
| Cl(1)-Pd(1)-C(1)-N(1)#1 | 116.1(6)  | C(4)-C(5)-C(6)-C(7)      | 0.3(7)    |
| C(1)-N(1)-C(2)-C(2)#1   | -3.7(11)  | C(5)-C(6)-C(7)-F(2)      | -172.4(5) |
| C(1)-N(1)-C(3)-C(4)     | 137.7(6)  | C(5)-C(6)-C(7)-C(8)      | -1.1(6)   |
| C(1)-N(1)-C(3)-C(8)     | -40.6(9)  | F(1)-C(5)-C(6)-C(7)      | -177.0(5) |
| N(1)#1-C(1)-N(1)-C(2)   | 1.5(4)    | C(6)-C(7)-C(8)-C(3)      | 1.6(5)    |
| N(1)#1-C(1)-N(1)-C(3)   | 176.8(10) | F(2)-C(7)-C(8)-C(3)      | 171.1(5)  |
| N(1)-C(3)-C(4)-C(5)     | -177.7(5) | C(8)-C(3)-C(4)-C(5)      | 0.6(6)    |
| N(1)-C(3)-C(8)-C(7)     | 176.8(5)  | N(2)-C(9)-C(10)-C(11)    | -5.0(14)  |
| C(2)-N(1)-C(3)-C(4)     | -47.1(9)  | C(9)#1-N(2)-C(9)-C(10)   | 2.3(6)    |
| C(2)-N(1)-C(3)-C(8)     | 134.6(7)  | C(9)-C(10)-C(11)-C(10)#1 | 2.7(7)    |

Symmetry transformations to generate equivalent atoms: #1 -x+1, y, -z+1 #2 -x+1, -y+1, -z+1

### The structure of 4c

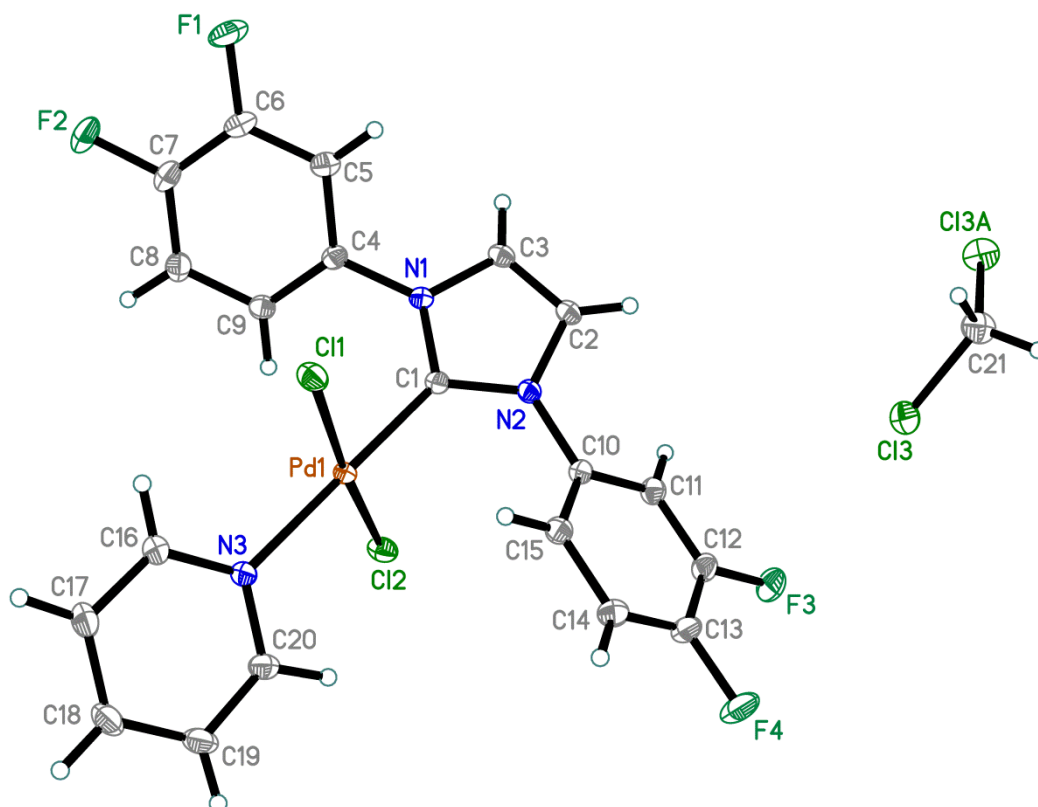

**Figure S47.** The molecular structure of **4c**·½CH<sub>2</sub>Cl<sub>2</sub>. Thermal ellipsoids are set to a 50% probability level.

**Table S14.** Selected bond distances for **4c** (Å).

| Atoms       | Distance   | Atoms      | Distance   | Atoms       | Distance   |
|-------------|------------|------------|------------|-------------|------------|
| Pd(1)-Cl(1) | 2.3155(3)  | N(2)-C(1)  | 1.3563(14) | C(8)-C(9)   | 1.3935(16) |
| Pd(1)-Cl(2) | 2.3178(3)  | N(2)-C(2)  | 1.3962(14) | C(10)-C(11) | 1.3963(16) |
| Pd(1)-N(3)  | 2.0872(10) | N(2)-C(10) | 1.4283(14) | C(10)-C(15) | 1.3917(16) |
| Pd(1)-C(1)  | 1.9558(11) | N(3)-C(16) | 1.3481(16) | C(11)-C(12) | 1.3807(16) |
| F(1)-C(6)   | 1.3392(14) | N(3)-C(20) | 1.3441(15) | C(12)-C(13) | 1.3814(18) |
| F(2)-C(7)   | 1.3497(14) | C(2)-C(3)  | 1.3459(16) | C(13)-C(14) | 1.3814(18) |
| F(3)-C(12)  | 1.3436(14) | C(4)-C(5)  | 1.3918(16) | C(14)-C(15) | 1.3962(16) |
| F(4)-C(13)  | 1.3439(14) | C(4)-C(9)  | 1.3919(16) | C(16)-C(17) | 1.3852(18) |
| N(1)-C(1)   | 1.3582(14) | C(5)-C(6)  | 1.3806(17) | C(17)-C(18) | 1.389(2)   |
| N(1)-C(3)   | 1.3958(14) | C(6)-C(7)  | 1.3799(18) | C(18)-C(19) | 1.387(2)   |
| N(1)-C(4)   | 1.4277(14) | C(7)-C(8)  | 1.3849(17) |             |            |

**Table S15.** Selected bond angles for **4c** (°).

| Atoms             | Angle       | Atoms             | Angle      |
|-------------------|-------------|-------------------|------------|
| Cl(1)-Pd(1)-Cl(2) | 175.042(10) | F(1)-C(6)-C(7)    | 119.41(11) |
| N(3)-Pd(1)-Cl(1)  | 91.57(3)    | C(7)-C(6)-C(5)    | 120.89(11) |
| N(3)-Pd(1)-Cl(2)  | 93.38(3)    | F(2)-C(7)-C(6)    | 118.79(11) |
| C(1)-Pd(1)-Cl(1)  | 87.49(3)    | F(2)-C(7)-C(8)    | 120.32(12) |
| C(1)-Pd(1)-Cl(2)  | 87.57(3)    | C(6)-C(7)-C(8)    | 120.89(11) |
| C(1)-Pd(1)-N(3)   | 178.63(4)   | C(7)-C(8)-C(9)    | 119.00(11) |
| C(1)-N(1)-C(3)    | 110.72(9)   | C(4)-C(9)-C(8)    | 119.58(10) |
| C(1)-N(1)-C(4)    | 125.07(9)   | C(11)-C(10)-N(2)  | 117.57(10) |
| C(3)-N(1)-C(4)    | 124.13(9)   | C(15)-C(10)-N(2)  | 121.36(10) |
| C(1)-N(2)-C(2)    | 110.67(9)   | C(15)-C(10)-C(11) | 121.06(10) |
| C(1)-N(2)-C(10)   | 126.10(9)   | C(12)-C(11)-C(10) | 118.46(11) |
| C(2)-N(2)-C(10)   | 123.21(9)   | F(3)-C(12)-C(11)  | 119.55(11) |
| C(16)-N(3)-Pd(1)  | 121.76(8)   | F(3)-C(12)-C(13)  | 119.54(11) |
| C(20)-N(3)-Pd(1)  | 119.77(8)   | C(11)-C(12)-C(13) | 120.90(11) |
| C(20)-N(3)-C(16)  | 118.34(10)  | F(4)-C(13)-C(12)  | 118.62(11) |
| N(1)-C(1)-Pd(1)   | 127.18(8)   | F(4)-C(13)-C(14)  | 120.55(12) |
| N(2)-C(1)-Pd(1)   | 127.81(8)   | C(14)-C(13)-C(12) | 120.83(11) |
| N(2)-C(1)-N(1)    | 104.98(9)   | C(13)-C(14)-C(15) | 119.28(11) |
| C(3)-C(2)-N(2)    | 106.88(10)  | C(10)-C(15)-C(14) | 119.44(11) |
| C(2)-C(3)-N(1)    | 106.74(9)   | N(3)-C(16)-C(17)  | 122.32(12) |
| C(5)-C(4)-N(1)    | 117.84(10)  | C(16)-C(17)-C(18) | 119.04(13) |
| C(5)-C(4)-C(9)    | 121.14(10)  | C(19)-C(18)-C(17) | 118.75(12) |
| C(9)-C(4)-N(1)    | 121.02(10)  | C(20)-C(19)-C(18) | 119.03(12) |
| C(6)-C(5)-C(4)    | 118.43(11)  | N(3)-C(20)-C(19)  | 122.51(12) |
| F(1)-C(6)-C(5)    | 119.68(12)  |                   |            |

**Table S16.** Torsion angles for **4c** (°).

| Atoms                  | Angle       | Atoms                | Angle       |
|------------------------|-------------|----------------------|-------------|
| Pd(1)-N(3)-C(16)-C(17) | -175.76(11) | C(4)-N(1)-C(1)-Pd(1) | 1.12(16)    |
| Pd(1)-N(3)-C(20)-C(19) | 175.73(10)  | C(4)-N(1)-C(1)-N(2)  | -177.12(10) |
| F(1)-C(6)-C(7)-F(2)    | -0.69(18)   | C(4)-N(1)-C(3)-C(2)  | 176.60(10)  |
| F(1)-C(6)-C(7)-C(8)    | 179.34(11)  | C(4)-C(5)-C(6)-F(1)  | 178.87(11)  |
| F(2)-C(7)-C(8)-C(9)    | -178.28(11) | C(4)-C(5)-C(6)-C(7)  | 0.47(19)    |
| F(3)-C(12)-C(13)-F(4)  | -0.06(19)   | C(5)-C(4)-C(9)-C(8)  | -2.38(18)   |
| F(3)-C(12)-C(13)-C(14) | 179.33(12)  | C(5)-C(6)-C(7)-F(2)  | 177.72(11)  |
| F(4)-C(13)-C(14)-C(15) | 179.76(12)  | C(5)-C(6)-C(7)-C(8)  | -2.26(19)   |
| N(1)-C(4)-C(5)-C(6)    | -177.97(11) | C(6)-C(7)-C(8)-C(9)  | 1.70(18)    |

|                        |            |                         |             |
|------------------------|------------|-------------------------|-------------|
| N(1)-C(4)-C(9)-C(8)    | 177.43(10) | C(7)-C(8)-C(9)-C(4)     | 0.59(17)    |
| N(2)-C(2)-C(3)-N(1)    | 0.72(13)   | C(9)-C(4)-C(5)-C(6)     | 1.84(18)    |
| N(2)-C(10)-C(11)-C(12) | 179.39(11) | C(10)-N(2)-C(1)-Pd(1)   | 4.07(17)    |
| N(2)-C(10)-C(15)-C(14) | 179.41(11) | C(10)-N(2)-C(1)-N(1)    | -177.70(10) |
| N(3)-C(16)-C(17)-C(18) | -0.2(2)    | C(10)-N(2)-C(2)-C(3)    | 177.54(10)  |
| C(1)-N(1)-C(3)-C(2)    | -0.31(13)  | C(10)-C(11)-C(12)-F(3)  | -179.77(11) |
| C(1)-N(1)-C(4)-C(5)    | 139.93(12) | C(10)-C(11)-C(12)-C(13) | 1.21(18)    |
| C(1)-N(1)-C(4)-C(9)    | -39.88(17) | C(11)-C(10)-C(15)-C(14) | -1.71(18)   |
| C(1)-N(2)-C(2)-C(3)    | -0.92(13)  | C(11)-C(12)-C(13)-F(4)  | 178.95(12)  |
| C(1)-N(2)-C(10)-C(11)  | 140.96(12) | C(11)-C(12)-C(13)-C(14) | -1.7(2)     |
| C(1)-N(2)-C(10)-C(15)  | -40.12(17) | C(12)-C(13)-C(14)-C(15) | 0.4(2)      |
| C(2)-N(2)-C(1)-Pd(1)   | -177.52(8) | C(13)-C(14)-C(15)-C(10) | 1.27(19)    |
| C(2)-N(2)-C(1)-N(1)    | 0.71(12)   | C(15)-C(10)-C(11)-C(12) | 0.47(18)    |
| C(2)-N(2)-C(10)-C(11)  | -37.25(16) | C(16)-N(3)-C(20)-C(19)  | -0.26(18)   |
| C(2)-N(2)-C(10)-C(15)  | 141.67(12) | C(16)-C(17)-C(18)-C(19) | 0.4(2)      |
| C(3)-N(1)-C(1)-Pd(1)   | 178.00(8)  | C(17)-C(18)-C(19)-C(20) | -0.5(2)     |
| C(3)-N(1)-C(1)-N(2)    | -0.25(12)  | C(18)-C(19)-C(20)-N(3)  | 0.4(2)      |
| C(3)-N(1)-C(4)-C(5)    | -36.53(16) | C(20)-N(3)-C(16)-C(17)  | 0.16(19)    |
| C(3)-N(1)-C(4)-C(9)    | 143.65(11) |                         |             |

**Table S17.** Dihedral angles for **4c**, **4a2** and **4c**(°).

|            | Plane 1                    | Plane 2                    | Angle    |
|------------|----------------------------|----------------------------|----------|
| <b>4a1</b> | N1, N2, C1, C2, C3         | C4..C9                     | 56.67(5) |
|            | N1, N2, C1, C2, C3         | C10..C15                   | 63.02(5) |
|            | N1, N2, C1, C2, C3         | Pd1, C11, C12, C1, N3      | 76.66(4) |
|            | Pd1, C11, C12, C1, N3      | N3, C16..C20               | 29.28(5) |
|            | Pd1, C11, C12, C1          | Pd1, C11, C12, N3          | 8.09(5)  |
| <b>4a2</b> | N1A, N2A, C1A, C2A, C3A    | C4A..C9A                   | 59.19(6) |
|            | N1A, N2A, C1A, C2A, C3A    | C10A..C15A                 | 52.38(7) |
|            | N1A, N2A, C1A, C2A, C3A    | Pd1A, C11A, C12A, C1A, N3A | 82.75(5) |
|            | Pd1A, C11A, C12A, C1A, N3A | N3A, C16A..C20A            | 45.68(5) |
|            | Pd1A, C11A, C12A, C1A      | Pd1A, C11A, C12A, N3A      | 2.50(9)  |
|            | N1B, N2B, C1B, C2B, C3B    | C4B..C9B                   | 50.55(7) |
|            | N1B, N2B, C1B, C2B, C3B    | C10B..C15B                 | 54.14(7) |
|            | N1B, N2B, C1B, C2B, C3B    | Pd1B, C11B, C12B, C1B, N3B | 77.15(4) |
|            | Pd1B, C11B, C12B, C1B, N3B | N3B, C16B..C20B            | 44.5 (3) |
|            | Pd1B, C11B, C12B, C1B      | Pd1B, C11B, C12B, N3B      | 7.33(2)  |
| <b>4c</b>  | N1, N2, C1, C2, C3         | C4..C9                     | 38.23(4) |
|            | N1, N2, C1, C2, C3         | C10..C15                   | 38.30(4) |
|            | N1, N2, C1, C2, C3         | Pd1, C11, C12, C1, N3      | 70.87(3) |
|            | Pd1, C11, C12, C1, N3      | N3, C16..C20               | 41.41(3) |
|            | Pd1, C11, C12, C1          | Pd1, C11, C12, N3          | 1.27(6)  |

**Table S18.** Atom deviations from the PdCl<sub>2</sub>CN plane (Å).

| Compound     | Pd1        | C11        | Cl2        | C1         | N3         |
|--------------|------------|------------|------------|------------|------------|
| <b>4a1</b>   | -0.0088(3) | -0.0807(3) | -0.0815(3) | 0.0934(5)  | 0.0775(4)  |
| <b>4a2_A</b> | -0.0212(4) | 0.0372(4)  | 0.0370(4)  | -0.0292(6) | -0.0238(5) |
| <b>4a2_B</b> | -0.0046(4) | 0.0801(5)  | 0.0787(4)  | -0.0827(7) | -0.0715(6) |
| <b>4c</b>    | 0.0040(3)  | 0.0115(3)  | 0.0113(3)  | -0.0144(5) | -0.0124(4) |

The core fragment PdCl<sub>2</sub>CN in **4a1** and in **4a2** (molecule *B*) is not entirely flat (Table S18): This fragment has a slightly bent conformation; PdCl<sub>2</sub>C-PdCl<sub>2</sub>N folding angles are provided in Table S17.
